1 **The long-time orphan protist *Meringosphaera mediterranea* Lohmann, 1902 [1903] is a**  
2 **centrohelid heliozoan**

3  
4 Vasily V. Zlatogursky <sup>a,c</sup>, Yegor Shakhkin <sup>a</sup>, Daria Drachko <sup>a,b</sup>, Fabien Burki <sup>c,d</sup>

5 <sup>a</sup> St. Petersburg State University, Department of Invertebrate Zoology, Faculty of Biology, St.  
6 Petersburg, 199034, Russia

7 <sup>b</sup> Laboratory of Cellular and Molecular Protistology, Zoological Institute RAS, St.  
8 Petersburg, 199034, Russia

9 <sup>c</sup> Department of Organismal Biology, Systematic Biology Program, Uppsala University,  
10 Kåbovägen 4A, SE-75236, Uppsala, Sweden

11  
12 <sup>d</sup> Science for Life Laboratory, Uppsala University, Uppsala, Sweden

13  
14  
15 **Correspondence**

16 Vasily V. Zlatogursky, St. Petersburg State University, Department of Invertebrate Zoology,  
17 Faculty of Biology, St. Petersburg, 199034, Russia

18 Telephone number: +79030998896, Fax number: +78123289703, e-mail:  
19 v.zlatogursky@gmail.com

20

21

22 **ABSTRACT.** *Meringosphaera* is an enigmatic marine protist without clear phylogenetic  
23 affiliation, but it has long been suggested to be a chrysophytes-related autotroph.  
24 Microscopy-based reports indicate that it has a worldwide distribution, but no sequence data  
25 exists so far. We obtained the first 18S rDNA sequence for *M. mediterranea* (identified using  
26 light and electron microscopy) from the West Coast of Sweden. Observations of living cells  
27 revealed granulated axopodia and up to 6 globular photosynthesizing bodies about 2  $\mu\text{m}$  in  
28 diameter, the nature of which requires further investigation. The ultrastructure of barbed  
29 undulating spine scales and patternless plate scales with a central thickening is in agreement  
30 with previous reports. Molecular phylogenetic analysis placed *M. mediterranea* inside the  
31 NC5 environmental clade of Centroplasthelida (Haptista) along with additional  
32 environmental sequences, together closely related to Choanocystidae. This placement is  
33 supported by similar scales in *Meringosphaera* and Choanocystidae. We searched the Tara  
34 Oceans 18S-V9 metabarcoding dataset which revealed four OTUs with 95.5-98.5%  
35 similarity, with oceanic distribution similar to that based on morphological observations. The  
36 current taxonomic position and species composition of the genus are discussed. The  
37 planktonic lifestyle of *M. mediterranea* contradicts the view of some authors that centrohelids  
38 enter the plankton only temporarily.  
39 **Keywords:** Centrohelids; External skeleton; Heliozoa; Protists; Systematics; Ultrastructure

40

41 IN 1887, Victor Hensen, a German zoologist and the founder of planktology (Lussenhop  
42 1974) reported a finding of what he described as a yellow microscopic plant with rigid  
43 flexuous outgrowths (starr gewundenen ausläufer) in the plankton of the Baltic sea (von  
44 Hensen 1887). A few years later, a similar organism was found by Lohmann near the coast of  
45 Sicily, who erected for it the new genus *Meringosphaera* Lohmann, 1902 [1903]<sup>1</sup> (from  
46 greek  $\mu\pi\rho\upsilon\gamma\acute{\xi}$  - bristle and  $\sigma\phi\alpha\epsilon\rho\alpha$  - ball, globe). According to Lohmann (1902 [1903] p.  
47 68), the genus was home to unarmoured (ohne Panzer) green chromatophores-bearing cells  
48 without encircling groove (Gürtelfurche), but with long bristles for floating (Schwebborsten).  
49 In *M. mediterranea*—the species that was later fixed as type (Loeblich and Tappan 1963)—  
50 Lohmann described four chromatophores, which had a peripheral position and a cup-like  
51 shape. In contrast to the original description by Hensen, Lohmann reported green, not yellow  
52 color of the chromatophores, but he considered this species an alga of undetermined origin  
53 (protophyten unsioherer Stellung) (Lohmann 1902 [1903]). In addition to *M. mediterranea*,  
54 Lohmann included the description of three additional species. In the following years, a dozen  
55 additional species of *Meringosphaera* were described by various authors but due to a vague  
56 genus diagnosis it contained a collection of unlikely related forms, most of which were later  
57 transferred to other genera (see Silva (1979) for review of the taxonomic history).  
58 Nevertheless, the type species—*Meringosphaera mediterranea* Lohmann, 1902 [1903]—is  
59 notable and recognizable even by light microscopy (Leadbeater 1974). It is often reported  
60 from marine plankton habitats worldwide (Table S1; Fig. 1). In some regions, it can be one of  
61 the most common and abundant planktonic species (LeRoi and Hallegraeff 2006;  
62 Thornington-Smith 1970), reaching the concentration of  $8 \times 10^4$  cells  $l^{-1}$  (Booth et al. 1982).  
63 *M. mediterranea* has been reported from the surface down to 125 m deep waters (micrograph  
64 JRYSEM-305-020 on mikrotax.org) and demonstrated a temperature tolerance from 0 to  
65 30 °C (Hallegraeff 1983; Thomsen 1982).

66 Despite the numerous reports of *Meringosphaera* worldwide, the taxonomic  
67 affiliation of the genus has remained mysterious. Wille (1909) classified it within the green  
68 algal family Oocystaceae, based on the presence of the green chromatophores and superficial  
69 resemblance to the genera *Micractinium* and *Oocystis*. Pascher (1912; 1917; 1932) and  
70 Schiller (1916; 1925) placed the genus in the yellow-green algal order Heterococcales. This  
71 view was mostly based on the observation of two-layered siliceous walls in the cysts of  
72 *Meringosphaera trisetata* (Pascher 1917), but this species was later shown to be a diatom  
73 (Thronsdon and Zingone 1994). Schiller (1916) also studied *M. mediterranea* and showed  
74 that the cells are surrounded by a rigid siliceous shell (Hulle), from which siliceous bristles  
75 emerge. Each bristle arises from the low circular cup, located upward on the shell. Norris  
76 (1971) studied material from the Indian Ocean and placed *Meringosphaera* in the family  
77 Aurospheeraceae in Chrysophyceae, based on a “golden tinge” of the living cells.  
78 Additionally, Norris provided the first ultrastructural account of the “bristles”, which were

---

<sup>1</sup> The volume with his work was issued with the year '1903' on the title page, but according to bibliographic notes of Oltmanns (1903, column 210), Zschokke (1903, p. 324), Matzdorff (1903a p. 116; 1903b p. 191), Graf zu Solms Laubach and Oltmanns (1904 column 103), and Krumbach (1907 p. 463), the actual year of its issue is 1902.

79 shown to be undulating tapering spine scales with short barbs directed towards the scale apex.  
80 The “shell” in turn was described as a layer of overlapping patternless plate scales with a  
81 central narrow thickening. Later, this characteristic morphology was observed and confirmed  
82 in multiple additional studies of the marine plankton. Leadbeater (1974) supported a  
83 chrysophycean affinity based on specimens collected in the Mediterranean sea, noting the  
84 similarity of the spine and plate scales with those of the chrysophyte *Chrysosphaerella* spp.  
85 Parke performed staining of the cell with dilute cresyl blue, which resulted in a rose-red color  
86 suggesting the presence of chrysolaminarin reserve products, again supporting a chrysophyte  
87 affiliation (personal communication of M. W. Parke in Leadbeater 1974). Moestrup (1979)  
88 found similar siliceous scales near the coast of New Zealand, which he also interpreted as  
89 chrysophycean affinities.

90 In the end of the XX century several authors expressed some doubt on the algal nature  
91 of *Meringosphaera* and suggested its possible relationship with centrohelid heliozoans.  
92 Thomsen was the first author to mention striking similarities between the scales of  
93 *Meringosphaera* with the siliceous scales of centrohelid heliozoans, particularly those of  
94 *Choanocystis perpusilla*—one of the first ultrastructurally studied (Petersen and Hansen  
95 1960) centrohelids (personal communication of Thomsen in Moestrup (1979 pp. 65, 92).  
96 Dürschmidt (1985) published an extensive study of the centrohelid scales and also noted that  
97 the morphology of *Meringosphaera* plate and spine scales “indicates close affinities to the  
98 heliozoa”. A similar view was expressed by Vørs (1992), who initially also suggested a  
99 relationship to the centrohelid *Choanocystis* based on the scale similarity. However, in a later  
100 report, Vørs and co-authors (1995) listed *Meringosphaera* among *incertae sedis* taxa and  
101 only vaguely referred to this organism as heliozoan-like heterotroph. The “chromatophores”  
102 were interpreted by Vørs as colored food vacuoles after preying on algae, not actual  
103 organelles. Ikävalko and Gradinger (1997) also reported a heterotrophic and centrohelid-  
104 related nature of this organism based on their observation of colorless living cells with no  
105 detectable chlorophyll, even when studied by epifluorescence microscopy with blue light  
106 excitation.

107 However, in most of the more recent publications, the suggestions of heliozoan-  
108 related nature were dismissed and *Meringosphaera* is referred to as chrysophyte (Fragoso  
109 2016; Hasle and Heimdal 1998; LeRoi and Hallegraeff 2006; Liu and Chen 2015; Percopo et  
110 al. 2011; Scott and Marchant 2005; Viličić et al. 2002) or xanthophyte (Cărăuș 2002),  
111 although sometimes also as *incertae sedis* taxon (Adl et al. 2005, 2012, 2018; Bergesch et al.  
112 2008; Bosak et al. 2012). In order to clarify the systematic position of *M. mediterranea*, we  
113 obtained the first 18S rDNA sequences for the genus based on several individual cells  
114 collected on the West Coast of Sweden, and combined these to microscopic observations of  
115 living cells and transmission electron microscopy. We unambiguously shown that  
116 *Meringosphaera* belong to centrohelids, specifically to the environmental marine clade NC5.

117

## 118 **MATERIAL AND METHODS**

119

### 120 **Sampling and cell isolation**

121

122 The material for this study was obtained from marine samples collected at two stations along  
123 the West Coast of Sweden: Anholt East (N 56°40'00" E 12°07'00") and Å17 (N 58°16'29" E  
124 10°30'47"). Samples were collected on 17.10.2018 at Anholt, and on 11.11.2018 and  
125 07.12.2018 at Å17 by SMHI (Swedish Meteorological and Hydrological Institute) on the R/V  
126 Aranda, simply by collecting about 1 liter of surface water with a bucket. The water salinity  
127 at the sampling sites was around 27 psu at Anholt E and 33 psu at Å17. The water  
128 temperature was around 13 degrees in October, 10 degrees in November and around 8  
129 degrees in December. The samples were transported to the laboratory on cooling packs in a  
130 foam plastic box. In the laboratory, the samples were passed through a 5–15 µm pore size  
131 paper membrane (VWR, Cat No. 516-0813) by gravity filtration to avoid damaging the cells–  
132 *M. mediterranea* cells are very fragile. The filters were washed in a 60 mm plastic Petri dish  
133 with 10 ml of filter-sterilized marine water. The dishes were scanned for characteristic *M.*  
134 *mediterranea* morphology using a 40 × lense of the Nikon Eclipse Ts2R inverted  
135 microscope, equipped with phase contrast. The detected cells were photographed with a  
136 Nikon D5300 camera and collected with a tapered Pasteur pipette. In general, we observed  
137 between 10 and 50 *Meringosphaera* cells per dish using this approach. The collected cells  
138 were placed on a glass slide for microscopy or frozen in 200 µl PCR tubes for molecular  
139 experiments. The DIC and fluorescent images were obtained from temporary preparations  
140 observed with Leica DMRXE microscope.

141

#### 142 **Electron microscopy**

143

144 Preparation of the scales for scanning electron microscopy was conducted according to  
145 Zlatogursky (2014). The cells were air-dried on the surface of a coverslip. The coverslips  
146 were washed with distilled water, attached to specimen stubs, gold-coated and observed with  
147 a Zeiss Auriga working station operated at 5 kV. Scales were measured in EM images.

148

#### 149 **Genome amplification and PCR**

150

151 Frozen single cells in PCR tubes were thawed and subjected to lysis and multiple  
152 displacement amplification (MDA) using the REPLI-g UltraFast Mini kit (Qiagen) following  
153 the manufacturer's instructions. The product of the MDA reactions were 10X diluted and  
154 used as templates in PCR amplification of the 18S rDNA gene using broad eukaryotic  
155 primers: PF1 5'-TGCGCTACCTGGTTGATCCTGCC-3' (Keeling 2002) and FAD4 5'-  
156 TGATCCTTCTGCAGGTTACCTAC-3' (Deane et al. 1998; Medlin et al. 1988). One of the  
157 obtained PCR products was purified with ExoProStar 1-Step kit (GE Healthcare US77702)  
158 and Sanger-sequenced directly at Macrogen (Netherlands). The obtained sequence was  
159 deposited in GenBank under accession number ##### (to be inserted prior to publication).

160

#### 161 **Phylogenetic analyses**

162

163 The sequence was quality-checked for ambiguous bases in Chromas Pro, and  
164 manually aligned using SeaView v. 4.3.5 (Gouy et al. 2010) on an available alignment

165 including a broad diversity of eukaryotes. Then 1531 unambiguously aligned positions were  
166 selected for phylogenetic analysis. Initial Maximum Likelihood (ML) analyses indicated that  
167 *M. mediterranea* is a centrohelid, thus in subsequent analyses we included a broad diversity  
168 of sequences for this group. The final tree reconstruction was done using RAxML v. 8  
169 (Stamatakis 2014), using the GTR model and 4 gamma categories to take into account across  
170 sites rate heterogeneity, after model selection in Modeltest (Posada and Crandall 1998).  
171 Assessment of clade support was performed with bootstrap resampling using 1,000 replicates.

172

### 173 **Search against TARA**

174

175 The search against Tara oceans OTU 18S V9 v. 2 database was performed using the Ocean  
176 Barcode Atlas website (<http://oba.mio.osupytheas.fr/>), using our complete 18S rDNA as a  
177 query and the vsearch algorithm with 98% similarity threshold.

178

## 179 **RESULTS**

180

### 181 **Light microscopy**

182

183 The light microscopic description is mostly based on material collected from Anholt  
184 sampling site. The observed *M. mediterranea* cells were 4–9 µm in diameter, typically with  
185 6–9 prominent axopodia and up to 13 undulating spine scales per optical section (Fig. 2C, D).  
186 Axopodia were distinctively granulated, 6–16 µm long, usually exceeding the cell diameter  
187 by 1.5–2 times. Cells without visible axopodia were sometimes also observed. The cells were  
188 always motionless, passively attached to the substratum or floating. All the specimens  
189 observed had a yellow-greenish tinge, containing several globular photosynthesizing bodies.  
190 One cell was squeezed with a coverslip, which revealed 6 distinct photosynthesizing bodies  
191 of about 2 µm in diameter (Fig. 2A). The chlorophyll autofluorescence emanating from the  
192 photosynthesizing bodies was clearly visible when subjected to fluorescence microscopy with  
193 blue excitation and green-red emission (Fig. 2B).

194

### 195 **Electron microscopy**

196

197 The skeletal elements of the cells (plate scales and spine scales) from Å17 (mostly) as well as  
198 from Anholt sampling points were studied with scanning electron microscopy (Fig. 3). The  
199 spine scales were typically 16–25 µm long, but in one case a single 31 µm giant spine scale  
200 was observed. The shaft of each scale with 9–13 undulations was covered with barbs (Fig.  
201 3A, B). Usually, there were 1–3 longer barbs, about twice longer than the shaft diameter at  
202 the proximal part of the scale (Fig. 3C) and multiple (15–24) shorter barbs distributed in a  
203 helicoidal pattern along the whole scale length. Shorter barbs were flattened, triangular, and  
204 slightly curved in the direction of the scale tip. Spine scale shafts were hollow inside with  
205 internal septa, which seemed to be located at the inflection points between undulations. The  
206 bases of the spine scales were convex, with a single indentation and multiple (10–13) short



207 teeth along the margin. The plate scales were patternless, oval 1.8–3.2 × 1.4–2.1 μm, with a  
208 short central thickening.

209

### 210 **Molecular phylogeny**

211

212 A good quality sequence of the 18S rDNA gene of 1720 bp was obtained from SAG SC462  
213 from Anholt, which we considered the first sequence for the genus *Meringosphaera* (see  
214 discussion). A comparison in GenBank by BLASTn for highly similar sequences returned  
215 only unnamed environmental sequences belonging to centrohelids. The best environmental  
216 hit was KF130174 with 99.65% similarity and the best named hit - *Chlamyaster sterna*  
217 KY857824 with 93.62% similarity. In order to place this sequence in a phylogenetic context,  
218 a tree reconstruction including a broad selection of centrohelid taxa was performed. This  
219 analysis recovered a moderately supported position (81% bootstrap support) of the sequence  
220 within the NC5 environmental clade of Pterocystida (Fig. 4), following the environmental  
221 clade nomenclature of Cavalier-Smith and Chao (2012) and Shoshkin et al. (2018). The NC5  
222 clade included several additional environmental sequences (of a marine plankton origin  
223 wherever specified) and was sister to the Ch1 clade, containing the closest group with named  
224 species Choanocystidae.

225

### 226 **Metabarcoding dataset search**

227

228 We investigated the oceanic distribution of the *Meringosphaera* sequence derived from SAG  
229 SC462. A search against the Tara Oceans 18S V9 v. 2 metabarcoding dataset returned four  
230 hits (OTUs 18Sv.9-v.2 346365; 18Sv.9-v.2 557845; 18Sv.9-v.2 1004; 18Sv.9-v.2 35493),  
231 which had a global distribution (Fig. 5), maximal relative abundances in surface waters, but  
232 were also quite common in the vicinity of the deep chlorophyll maximum. In general, these  
233 OTUs had a low relative abundance, representing at most  $2.33e^{-3}$ . In the mesopelagic zone,  
234 the OTUs were less abundant but still present worldwide. The temperature tolerance range  
235 was high, varying from 2 to 33 °C, while salinity tolerance was quite narrow, varying between  
236 32 and 41 ppt and never below 28 ppt (Fig. 5). This matched our own observation that  
237 *Meringosphaera* occurred frequently on the Swedish West coast where the salinity is at about  
238 33 ‰, but could never be detected in samples from the Baltic Sea proper with a much lower  
239 salinity. The OTUs were found in all the size fractions, except the finest (0.8–3 μm).

240

## 241 **DISCUSSION**

242

243 The morphological analysis by light microscopy and the ultrastructure of the specimens  
244 studied strongly suggests that these organisms correspond to *Meringosphaera mediterranea*.  
245 Most of the species described under the genus name *Meringosphaera* have eventually found  
246 their homes in other genera, considered synonymous or too distinct and/or poorly described  
247 to safely keep them in the genus (Table 1). In fact, Silva (1979) proposed that the species  
248 diversity of the genus *Meringosphaera* should be restricted to *M. mediterranea* and *M.*  
249 *aculeata* Pascher, 1932. *M. aculeata*, despite the considerable similarity to *M. mediterranea*,

250 is distinct in having fewer undulations per scale and very long barbs, which Wulff (1919) was  
251 able to detect with light microscopy. His fig. 14 taf. II is in a good agreement with type 2  
252 scales on scanning electron micrographs (fig. 4 and 5 of Norris (1971)), as well as with the  
253 micrograph JRYSEM-317-330 published on the microtax.org website. Other micrographs,  
254 published under the name *M. mediterranea* are quite heterogeneous and probably represent  
255 several closely related species. For example, the morphotype with stellate base of the spine  
256 scale is very distinctive (fig. 3 and 8 of Norris (1971); fig. 2 of Vørs and co-authors (1995);  
257 micrograph JRYSEM-260-16 on microtax.org). The cells in our study were similar to typical  
258 *M. mediterranea* as in fig. 1 of Norris (1971); Plate 4 B–F of Leadbeater (1974); fig. 6 of  
259 Vørs (1992) and many other published micrographs, both by details of the ultrastructure and  
260 morphometric characters.

261 The new *M. mediterranea* sequence was clearly positioned in the environmental NC5  
262 group in centrohelids. In total, the NC5 group now contains 12 environmental sequences in  
263 GenBank, all marine, in addition to the new *Meringosphaera* 18S rDNA sequence. Our  
264 phylogeny also suggested a weak relationship to Ch1 - a mostly environmental clade with  
265 only two morphologically characterized sequences, representing the family Choanocystidae.  
266 Although this relationship requires confirmation due to the low bootstrap support, it is in  
267 agreement with the view of some authors (Moestrup 1979; Vørs 1992) who emphasized the  
268 similarity in the scale structure between *M. mediterranea* and *Choanocystis* spp. Since  
269 *Choanocystis* is a very species-rich genus with 18 described species (Mikrjukov 1995;  
270 Tihonenkov and Mylnikov 2010; Zlatogursky 2010, 2014), only two of which have been  
271 sequenced (Shakhkin et al. 2018), it is possible that some of the morphotypes attributed to  
272 *Choanocystis* actually belong to the NC5 clade. This is even more probable for the four  
273 exclusively marine species. For example, *Choanocystis antarctica* Tihonenkov et Mylnikov,  
274 2010 is one of the best candidates to be closely related to *Meringosphaera* since it also has a  
275 typical barb on each spine scale and each spine scale in this species possesses a single  
276 undulation.

277 The search using the new *M. mediterranea* sequence against the Tara Oceans 18S V9  
278 v. 2 database returned four OTUs with > 98% similarity, which we attribute to the same  
279 species. The geographic distribution of these OTUs is in good agreement with the  
280 morphology-based reports of *M. mediterranea*, confirming that this species is a global  
281 member of the oceanic plankton communities (compare Fig. 1 and Fig. 5). The finding of a  
282 global planktonic centrohelid species is at odds with the idea that centrohelids are only  
283 temporarily found in the water column. Mikrjukov (2002) argued that centrohelids are  
284 permanent important consumers in both freshwater and marine benthic communities but are  
285 only temporarily playing key ecological roles in the plankton, usually twice a year for a  
286 month. The common occurrence of *M. mediterranea* in many localities instead indicates that  
287 some centrohelids at least represent permanent members of planktonic communities. Our  
288 Tara Oceans search also confirmed a broad temperature tolerance as noted by Hallegraeff  
289 (1983), but a salinity tolerance restricted to oceanic values (Fig. 6). Finally, the vertical  
290 profile of *Meringosphaera*-related OTUs showed a distribution from the surface to  
291 mesopelagic zone, with relative abundance up to  $2.27e^{-3}$  at deep chlorophyll maximum, which  
292 may be correlated to the presence of photosynthetic bodies in this species (Fig. 5, 6). The  
293 nature of these photosynthetic bodies is one of the most outstanding questions regarding



294 *Meringosphaera*, but unfortunately we failed to obtain sequence data that could help identify  
295 their origin. These bodies could correspond to transient associations such as kleptoplasts or  
296 facultative symbionts, stable endosymbionts, or even permanent photosynthetic organelles.  
297 Regardless of the final answer on these bodies, here we've undoubtedly placed an important  
298 player in the marine planktonic ecosystem to its correct phylogenetic home.

299

## 300 **ACKNOWLEDGEMENTS**

301

302 This study was supported by a scholarship from Carl Tryggers Stiftelse to VZ (PI: FB) and  
303 the Russian Science Foundation grant no. 20-74-10068. Equipment of the core facility centers  
304 "Resource Center for Nanotechnology", "Development of molecular and cell technologies",  
305 "Computing center SPbU" and "Culturing of microorganisms" of Saint Petersburg State  
306 University was applied. FB was supported by a grant from Science for Life Laboratory.  
307 Authors are grateful to Ann-Turi Skjevik for providing SMHI samples.

308

## 309 **LITERATURE CITED**

310

- 311 Adl, S.M., Simpson, A.G.B., Farmer, M.A., Andersen, R.A., Anderson, R.A., Barta, J.,  
312 Bowser, S.S., Brugerolle, G., Fensome, R., Fredericq, S., James, T.Y., Karpov, S.A.,  
313 Kugrens, P., Krug, J., Lane, C., Lewis, L.A., Lodge, J., Lynn, D.H., Mann, D.,  
314 McCourt, R.M., Mendoza, L., Moestrup, O., Mozeley-Standridge, S.E., Nerad, T.A.,  
315 Shearer, C., Smirnov, A.V., Spiegel, F. & Taylor, F.J.R. 2005. The new higher level  
316 classification of eukaryotes with emphasis on the taxonomy of protists. *J. Eukaryot.*  
317 *Microbiol.*, 52: 399–451.
- 318 Adl, S.M., Simpson, A.G.B., Lane, C.E., Lukeš, J., Bass, D., Bowser, S.S., Brown, M.W.,  
319 Burki, F., Dunthorn, M., Hampl, V., Heiss, A., Hoppenrath, M., Lara, E., le Gall, L.,  
320 Lynn, D.H., McManus, H., Mitchell, E.A.D., Mozley-Stanridge, S.E., Parfrey, L.W.,  
321 Pawlowski, J., Rueckert, S., Shadwick, L., Schoch, C.L., Smirnov, A. & Spiegel,  
322 F.W. 2012. The Revised Classification of Eukaryotes. *J. Eukaryot. Microbiol.*, 59:  
323 429–514.
- 324 Adl, S.M., Bass, D., Lane, C.E., Lukeš, J., Schoch, C.L., Smirnov, A., Agatha, S., Berney, C.,  
325 Brown, M.W., Burki, F., Cárdenas, P., Čepička, I., Chistyakova, L., Del Campo, J.,  
326 Dunthorn, M., Edvardsen, B., Eglit, Y., Guillou, L., Hampl, V., Heiss, A.A.,  
327 Hoppenrath, M., James, T.Y., Karpov, S., Kim, E., Kolisko, M., Kudryavtsev, A.,  
328 Lahr, D.J.G., Lara, E., Le Gall, L., Lynn, D.H., Mann, D.G., Massana I Molera, R.,  
329 Mitchell, E.A.D., Morrow, C., Park, J.S., Pawlowski, J.W., Powell, M.J., Richter,  
330 D.J., Rueckert, S., Shadwick, L., Shimano, S., Spiegel, F.W., Torruella I Cortes, G.,  
331 Youssef, N., Zlatogursky, V. & Zhang, Q. 2018. Revisions to the Classification,  
332 Nomenclature, and Diversity of Eukaryotes. *J. Eukaryot. Microbiol.*, 66: 4–119.
- 333 Bergesch, M., Odebrecht, C. & Moestrup, Ø. 2008. Nanoflagellates from coastal waters of  
334 southern Brazil (32°S). *Bot. Mar.*, 51: 35–50.
- 335 Booth, B.C., Lewin, J. & Norris, R.E. 1982. Nanoplankton species predominant in the  
336 subarctic Pacific in May and June 1978. *Deep Sea Res. Part Oceanogr. Res. Pap.*, 29:  
337 185–200.
- 338 Bosak, S., Ljubešić, Z. & Viličić, D. 2012. SEM examination of fine structure of  
339 *Meringosphaera mediterranea*, a microalga of enigmatic taxonomic position. *Croat.*  
340 *Microsc. Symp. Book Abstr.* 42.
- 341 Cărauş, I. 2002. Algae of Romania. *Stud. Şi Cercet. Univ. Bacau Biol.*, 7: 1–694.

- 342 Cavalier-Smith, T. & Chao, E.E.-Y. 2012. *Oxnerella micra* sp. n. (Oxnerellidae fam. n.), a  
343 tiny naked centrohelid, and the diversity and evolution of heliozoa. *Protist*, 163: 574–  
344 601.
- 345 Deane, J.A., Hill, D.R.A., Brett, S.J. & McFadden, G.I. 1998. *Hanusia phi* gen. et sp. nov.  
346 (Cryptophyceae): characterization of ‘*Cryptomonas* sp. Φ.’ *Eur. J. Phycol.*, 33: 149–  
347 154.
- 348 Dürschmidt, M. 1985. Electron microscopic observations on scales of species of the genus  
349 *Acanthocystis* (Centrohelidia, Heliozoa) from Chile, I. *Arch Protistenkd*, 129: 55–87.
- 350 Ettl, H. 1977. Taxonomische Bemerkungen Zu Den Xanthophyceen. *Nova Hedwigia*, 28:  
351 555–568.
- 352 Fragoso, G.M. 2016. Biogeography of spring phytoplankton communities from the Labrador  
353 Sea: drivers, trends, ecological traits and biogeochemical implications. Dissertation.  
354 University of Southampton. 187 p.
- 355 Gouy, M., Guindon, S. & Gascuel, O. 2010. SeaView version 4: a multiplatform graphical  
356 user interface for sequence alignment and phylogenetic tree building. *Mol. Biol. Evol.*,  
357 27: 221–224.
- 358 Graf zu Solms Laubach, H. & Oltmanns, F. 1904. Litteraturverzeichnis. *Botanische Zeitung*,  
359 62 (6/7): columns 101–105.
- 360 Hallegraef, G.M. 1983. Scale-bearing and Loricated Nanoplankton from the East Australian  
361 *Current. Bot. Mar.*, 26: 493–516.
- 362 Hasle, G.R. & Heimdal, B.R. 1998. The net phytoplankton in Kongsfjorden, Svalbard, July  
363 1988, with general remarks on species composition of arctic phytoplankton. *Polar*  
364 *Res.*, 17: 31–52.
- 365 Ikävalko, J. & Gradinger, R. 1997. Flagellates and heliozoans in the Greenland Sea ice  
366 studied alive using light microscopy. *Polar Biol.*, 17: 473–481.
- 367 Keeling, P.J. 2002. Molecular phylogenetic position of *Trichomitopsis termopsidis*  
368 (Parabasalia) and evidence for the Trichomitopsiinae. *Eur. J. Protistol.*, 38: 279–286.
- 369 Krumbach, T. 1907. Hydroidea und Acalephae (mit Ausschluss der Siphonophora) für  
370 1901—1903. *Archiv für Naturgeschichte (Abteilung B)*, 67(3): 423–568.¶
- 371 Leadbeater, B. 1974. Ultrastructural observations on nanoplankton collected from the coast of  
372 Jugoslavia and the Bay of Algiers. *J. Mar. Biol. Assoc. U. K.*, 54: 179–196.
- 373 LeRoi, J.-M. & Hallegraef, G.M. 2006. Scale-bearing nanoflagellates from southern  
374 Tasmanian coastal waters, Australia. II. Species of chrysophyceae (Chrysophyta),  
375 prymnesiophyceae (Haptophyta, excluding Chrysochromulina) and prasinophyceae  
376 (Chlorophyta). *Bot. Mar.*, 49: 216–235.
- 377 Liu, H. & Chen, R. 2015. New Recorded Phytoplankton Species of *Meringosphaera*  
378 *mediterranea* Lohmann (Chrysophyceae) in the Yellow Sea. *J. Yantai Univ. Nat. Sci.*  
379 *Eng.*, 4: 300–302.
- 380 Loeblich, A.R. & Tappan, H. 1963. Type fixation and validation of certain calcareous  
381 nannoplankton genera. *Proc. Biol. Soc. Washington*, 76: 191–196.
- 382 Lohmann, H. 1902[1903]. Neue Untersuchungen über den Reichthum des Meeres an  
383 Plankton und über die Brauchbarkeit der verschiedenen Fangmethoden. Zugleich auch  
384 ein Beitrag zur Kenntniss des Mittelmeerauftriebs. In: Wissenschaftl.  
385 Meeresuntersuchung. herausgeg. v. d. Kommiss. zur Untersuch, d. deutschen Meere  
386 in Kiel und d. Biol. Anstalt auf Helgoland. Abteilung Kiel. N. F. 7:1–86.¶
- 387 Lohmann, H. 1913. Über Coccolithophoriden. *Verh. Dtsch. Zool. Ges.*, 23: 143–164.
- 388 Lohmann, H. 1908. Untersuchungen zur Feststellung des vollständigen Gehaltes des Meeres  
389 an Plankton. *Wiss. Meeresuntersuch. Kiel*, 10: 129–370.
- 390 Lussenhop, J. 1974. Victor Hensen and the Development of Sampling Methods in Ecology. *J.*  
391 *Hist. Biol.*, 7: 319–337.

- 392 Matzdorff, C. 1903a. Jahresbericht über die Bryozoen für 1899—1902. *Archiv für*  
393 *Naturgeschichte (Abteilung B)*, 63(2-3): 97–146.¶
- 394 Matzdorff, C. 1903b. Jahresbericht über die Tunicaten für 1899—1902. *Archiv für*  
395 *Naturgeschichte (Abteilung B)*, 63 (2-3): 147–216.¶
- 396 Medlin, L., Elwood, H.J., Stickle, S. & Sogin, M.L. 1988. The characterization of  
397 enzymatically amplified eukaryotic 16S-like rRNA-coding regions. *Gene*, 71: 491–  
398 499.
- 399 Mikrjukov, K.A. 1995. Revision of the species composition of the genus *Choanocystis*  
400 (Sarcodina Centroheliozoa) and its fauna in eastern Europe. *Zool. Zh.*, 74: 3–16.
- 401 Mikrjukov, K.A. 2002. Centrohelid heliozoans (Centroheliozoa). KMK Scientific Press,  
402 Moscow.
- 403 Moestrup, Ø. 1979. Identification by electron microscopy of marine nanoplankton from New  
404 Zealand, including the description of four new species. *N. Z. J. Bot.*, 17: 61–95.
- 405 Norris, R.E. 1971. Extant siliceous microalgae from the Indian Ocean. In: Farinacci, A. (Ed.),  
406 Proceedings of the II Planktonic Conference Roma 1970. Presented at the II  
407 Planktonic Conference, Edizioni Tecnoscienza. 911–919.
- 408 Oltmanns, F. 1903. Lozéron, H., La repartition verticale du Plancton dans le lac de  
409 Zürich etc. Disa. Zürich. 1902. 84 S. 5 Curven-Taf. Lohmann, H., Neue  
410 Untersuchungen über den Reichthum Plankton. des Meeres an z. Erf. deutscher Meere  
411 etc. Äbth. Kiel. N.F. 7. 1902.). *Botanische Zeitung*, 61 (14/15): columns 209–211.
- 412 Pascher, A. 1912. Zur Gliederung der Heterokonten. *Hedwigia*, 53: 6–22.
- 413 Pascher, A. 1917. Von der grünen Planktonalge des Meeres *Meringosphaera*. *Berichte der*  
414 *Deutschen Botanischen Gesellschaft*, 35: 170–175.
- 415 Pascher, A. 1932. Zur Kenntnis mariner Planktonen. I. *Meringosphaera* und ihre  
416 Verwandten. *Arch. Protistenkd.*, 77: 195–218.
- 417 Pascher, A. 1938. Heterokonten. In: Kryptogamen-Flora von Deutschland, Osterreich Und  
418 Der Schweiz. Lieferung. Akademische Verlagsgesellschaft, Leipzig. 481–640.
- 419 Percopo, I., Siano, R., Cerino, F., Sarno, D. & Zingone, A. 2011. Phytoplankton diversity  
420 during the spring bloom in the northwestern Mediterranean Sea. *Bot. Mar.*, 54: 243–  
421 267.
- 422 Petersen, J.B. & Hansen, J.B. 1960. Elektronenmikroskopische Untersuchungen von zwei  
423 Arten der Heliozoa Gattung *Acanthocystis*. *Arch. Protistenkd.*, 104: 547–552.
- 424 Posada, D. & Crandall, K. 1998. Modeltest: testing the model of DNA substitution.  
425 *Bioinformatics*, 14:817–818.
- 426 Schiller, J. 1925. Die planktonischen Vegetationen des adriatischen Meeres. B.  
427 Chrysomonadina, Heterokontae, Cryptomonadina, Eugleninae, Volvocales. I.  
428 Systematischer Teil. *Arch. Protistenkd.*, 53: 59–123.
- 429 Schiller, J. 1916. Über neue Arten und Membranverkiehlung bei *Meringosphaera*. *Arch.*  
430 *Protistenkd.*, 36: 198–208.
- 431 Scott, F.J. & Marchant, H.J. 2005. Antarctic marine protists. Aust. Biol. Resour. Study,  
432 Canberra.
- 433 Shakhin, Y., Drachko, D., Klimov, V.I. & Zlatogursky, V.V. 2018. *Yogsothoth knorrus* gen.  
434 n., sp. n. and *Y. carteri* sp. n. (Yogsothothidae fam. n., Haptista, Centroplasthelida),  
435 with Notes on Evolution and Systematics of Centrohelids. *Protist*, 169: 682–696.
- 436 Silva, P.C. 1979. Review of the taxonomic history and nomenclature of the yellow-green  
437 algae. *Arch. Protistenkd.*, 121: 20–63.
- 438 Stamatakis, A. 2014. RAxML version 8: a tool for phylogenetic analysis and post-analysis of  
439 large phylogenies. *Bioinformatics*, 30: 1312–1313.
- 440 Thomsen, H.A. 1982. Planktonic Choanoflagellates from Disko Bugt, West Greenland, with  
441 a Survey of the Marine Nanoplankton of the Area. *Bioscience*, 8: 1–35.

- 442 Thornington-Smith, M. 1970. Some new and little known phytoplankton forms from the West  
443 Indian Ocean. *Br. Phycol. J.*, 5: 51–56.
- 444 Thronsdon, J. & Zingone, A. 1994. Micronomads of the Mediterranean sea. *G. Bot. Ital.*, 128:  
445 1029–1106.
- 446 Tihonenkov, D.V. & Mylnikov, A.P. 2010. New heliozoan (*Choanocystis antarctica* sp. n.,  
447 Centrohelida) from littoral zone of King-George Island (The South-Shetland Islands,  
448 Antarctic). *Zool. Zh.*, 89: 1283–1287.
- 449 Viličić, D., Marasović, I. & Mioković, D. 2002. Checklist of phytoplankton in the eastern  
450 Adriatic Sea. *Acta Bot. Croat.*, 61: 57–91.
- 451 von Hensen, V. 1887. Über die Bestimmung des Planktons oder des im Meer treibenden  
452 Materials an Pflanzen und Tieren. *Ber Kommn Wiss Unters Dt Meere Kiel*, 5: 1–108.
- 453 Vørs, N. 1992. Heterotrophic protists (excl. dinoflagellates, loricate choanoflagellates and  
454 ciliates). In: Thomsen H. A. (Ed.), *Plankton from Inner Danish Waters: An Analysis*  
455 *of the Autotrophic and Heterotrophic Plankton in Kattegat*. HAV 90 Report. Danish  
456 National Agency for Environmental Protection, 195–249.
- 457 Vørs, N., Buck, N., Chavez, F.P., Eikrem, W., Hansen, L.E., Ostergaard, J.B. & Thomsen,  
458 H.A., 1995. Nanoplankton of the equatorial Pacific with emphasis on the  
459 heterotrophic protists. *Deep Sea Res. Pt II*, 42: 585–602.
- 460 Wille, N., 1909. Conjugatae und Chlorophyceae. In: Engler, A., Prantl, K., Pilger, R.K.F.,  
461 Krause, K. (Eds.), *Die Natürlichen Pflanzenfamilien Nebst Ihren Gattungen Und*  
462 *Wichtigeren Arten, Insbesondere Den Nutzpflanzen, Unter Mitwirkung Zahlreicher*  
463 *Hervorragender Fachgelehrten Begründet*. W. Engelmann, Leipzig, 1–175.
- 464 Wulff, A. 1919. Ueber das Kleinplankton der Barentssee. *Wissenschaftliche*  
465 *Meeresuntersuchungen in Kiel*, 13(Heft 1): 95–125.
- 466 Zlatogursky, V.V. 2014. Two new species of centrohelid heliozoans: *Acanthocystis costata*  
467 sp. nov. and *Choanocystis symna* sp. nov. *Acta Protozool.*, 53: 313–324.
- 468 Zlatogursky, V.V. 2010. Three new freshwater species of centrohelid heliozoans:  
469 *Acanthocystis crescenta* sp. nov., *A. kirilli* sp. nov., and *Choanocystis minima* sp. nov.  
470 *Eur. J. Protistol.*, 46: 159–163.
- 471 Zschokke, F. 1903. 339. Lohmann, H., Neue Untersuchungen über den Reichthum des  
472 Meeres an Plankton und über die Brauchbarkeit der verschiedenen Fangmethoden.  
473 Zugleich auch ein Beitrag zur Kenntniss des Mittelmeerauftriebs. In: *Wissenschaftl.*  
474 *Meeresuntersuchung*. herausgeg. v. d. Kommiss. zur Untersuch. d. deutschen Meere  
475 in Kiel und d. Biol. Anstalt auf Helgoland. Abteilung Kiel. N. F. Band 7. 1902. pag.  
476 1—87. Taf. 1—4. 14 Tabellen. *Zoologisches Zentralblatt*, 10: 324–330.

## 477 478 **FIGURE LEGENDS**

479  
480 **Fig. 1.** The map of the distribution of *Meringosphaera mediterranea*, based on literature  
481 records. For detailed references see Table S1.

482  
483 **Fig. 2.** *Meringosphaera mediterranea*, collected in Å17 (A, B) and Anholt (C, D) sampling  
484 points. Light microscopy, general view of the living cell. **A.** Differential interference contrast  
485 (DIC). **B.** The same field as in (A), fluorescent microscopy, blue excitation and green-red  
486 emission filters. **C.** Phase contrast, the cell is squashed under a cover-slip. **D.** Phase contrast.  
487 Undisturbed cell in a Petri dish. Abbreviations: a - axopodia; g - granules; pb -  
488 photosynthesizing bodies; ss - spine scales. Scale bars 20 µm.

489

490 **Fig. 3.** *Meringosphaera mediterranea*, collected in Å17 sampling point. Scanning electron  
491 microscopy. **A.** Individual spine scale. **B.** General view. **C.** Close up of plate scales and  
492 spine-scales proximal parts. Abbreviations: bp - basal plate of the spine scale; br - barbs; ct -  
493 central thickening of the plate scale; lbr - elongated barbs on the proximal part of the spine  
494 scale; n - notch on the spine scale base; ps - plate scales; sp - spikes on the spine scale base;  
495 ss - spine scales. Scale bars: **A, B** - 2  $\mu\text{m}$ ; **C** - 1  $\mu\text{m}$ .

496

497 **Fig. 4.** Maximum likelihood tree for 18S rDNA of 141 centrohelids and outgroup of 57  
498 sequences (1531 sites; GTR; bootstrap 1,000 replic. 4 rate classes). Outgroup and support  
499 values for shallow clades have been removed for clarity.

500

501 **Fig. 5.** Map of the geographic distribution of four *Meringosphaera*-related OTUs (Tara  
502 Oceans 18S V9 v. 2). Circles are proportional to abundance. Plankton organismal size  
503 fractions are color-coded. DCM - deep chlorophyll maximum; MES - mesopelagic zone  
504 (200-1000 m); MIX - mixed layer; SRF - surface water.

505

506 **Fig. 6.** Bubble plots, representing the co-variation of four *Meringosphaera*-related OTUs  
507 (Tara Oceans 18S V9 v. 2) abundance and an environmental feature at four sampling depth  
508 fractions (DCM - deep chlorophyll maximum; MES - mesopelagic zone (200-1000 m); MIX  
509 - mixed layer; SRF - surface water). Circles are proportional to abundance. Plankton  
510 organismal size fractions are color-coded.

511

## 512 **Tables**

513

514 **Table 1.** The list of all the species described in the genus *Meringosphaera* and their final  
515 taxonomic homes.

516

## 517 **SUPPORTING INFORMATION**

518

519 **Table S1.** The summary of literature reports of *Meringosphaera mediterranea*.



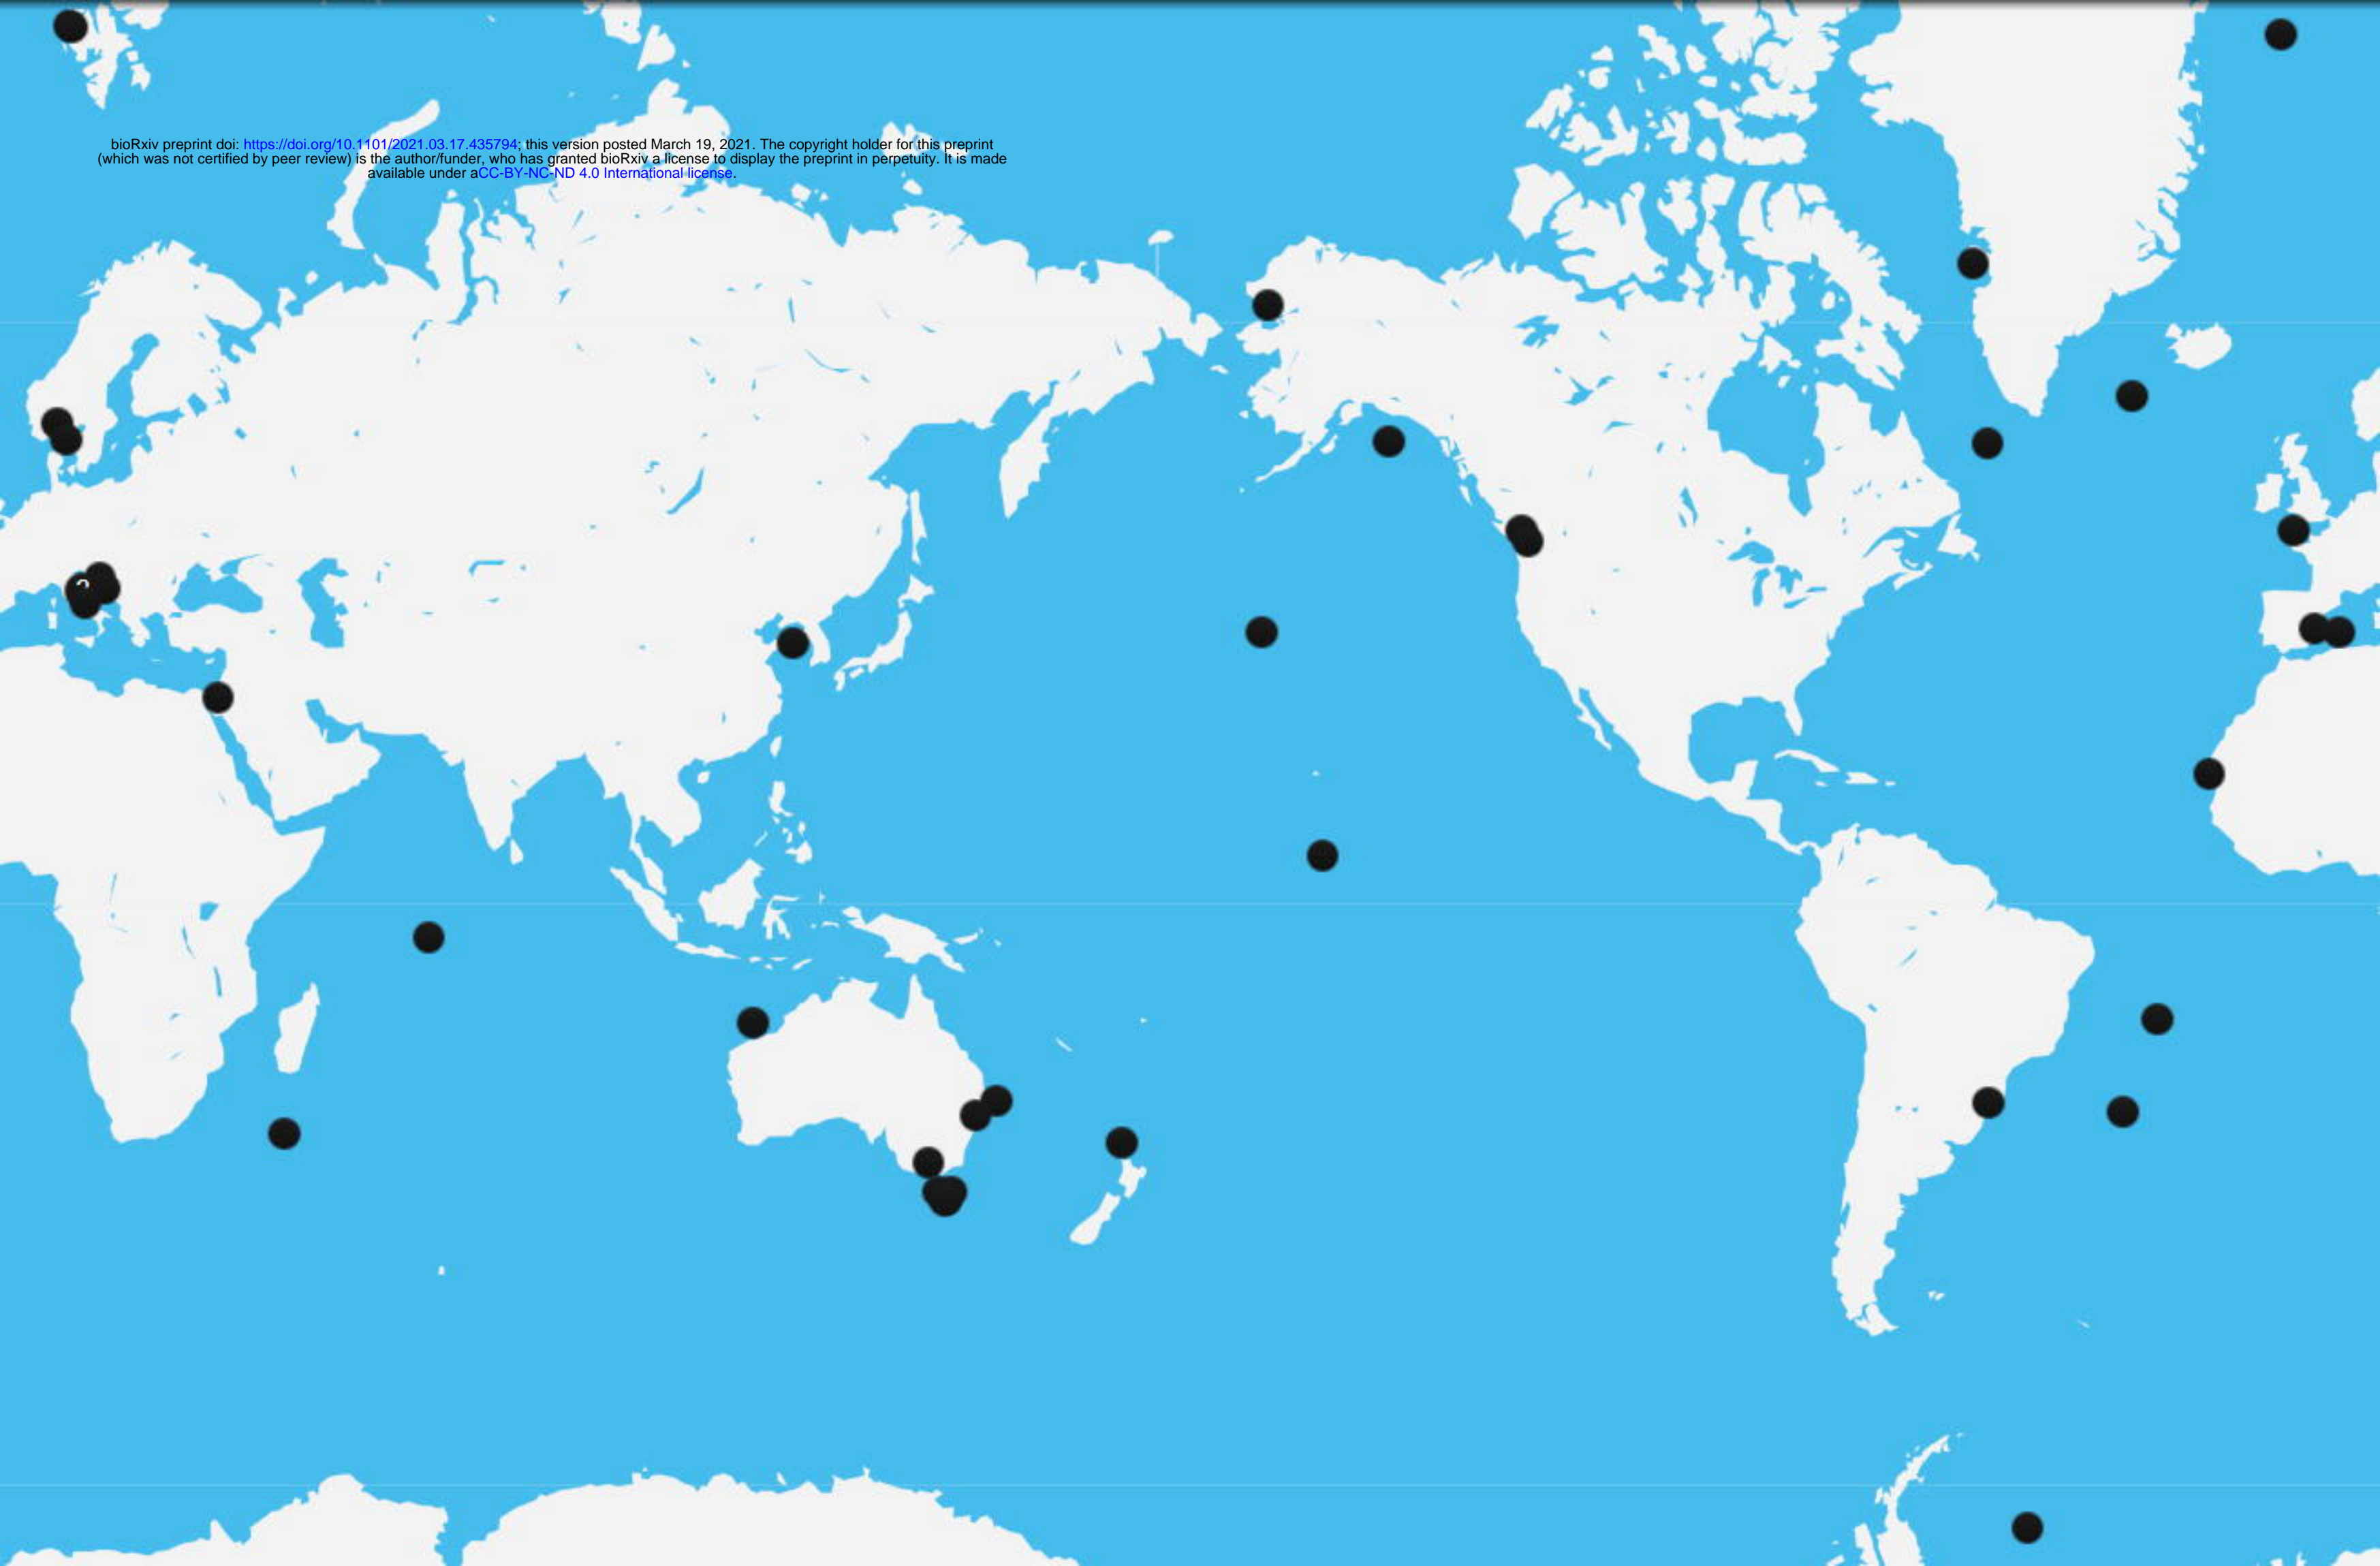



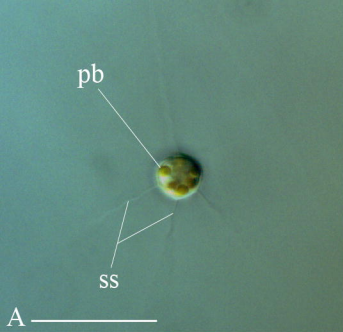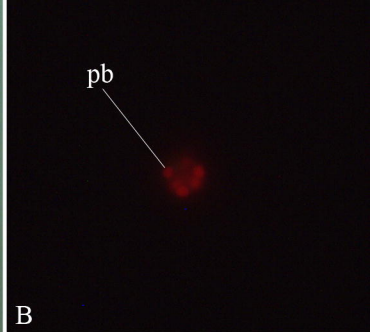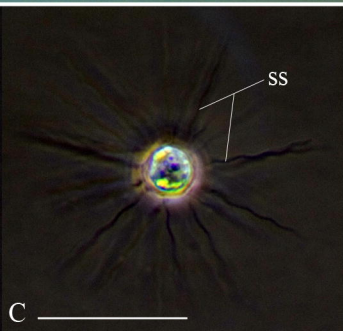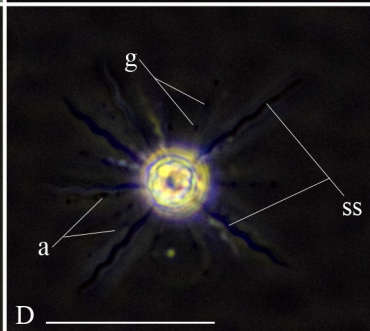

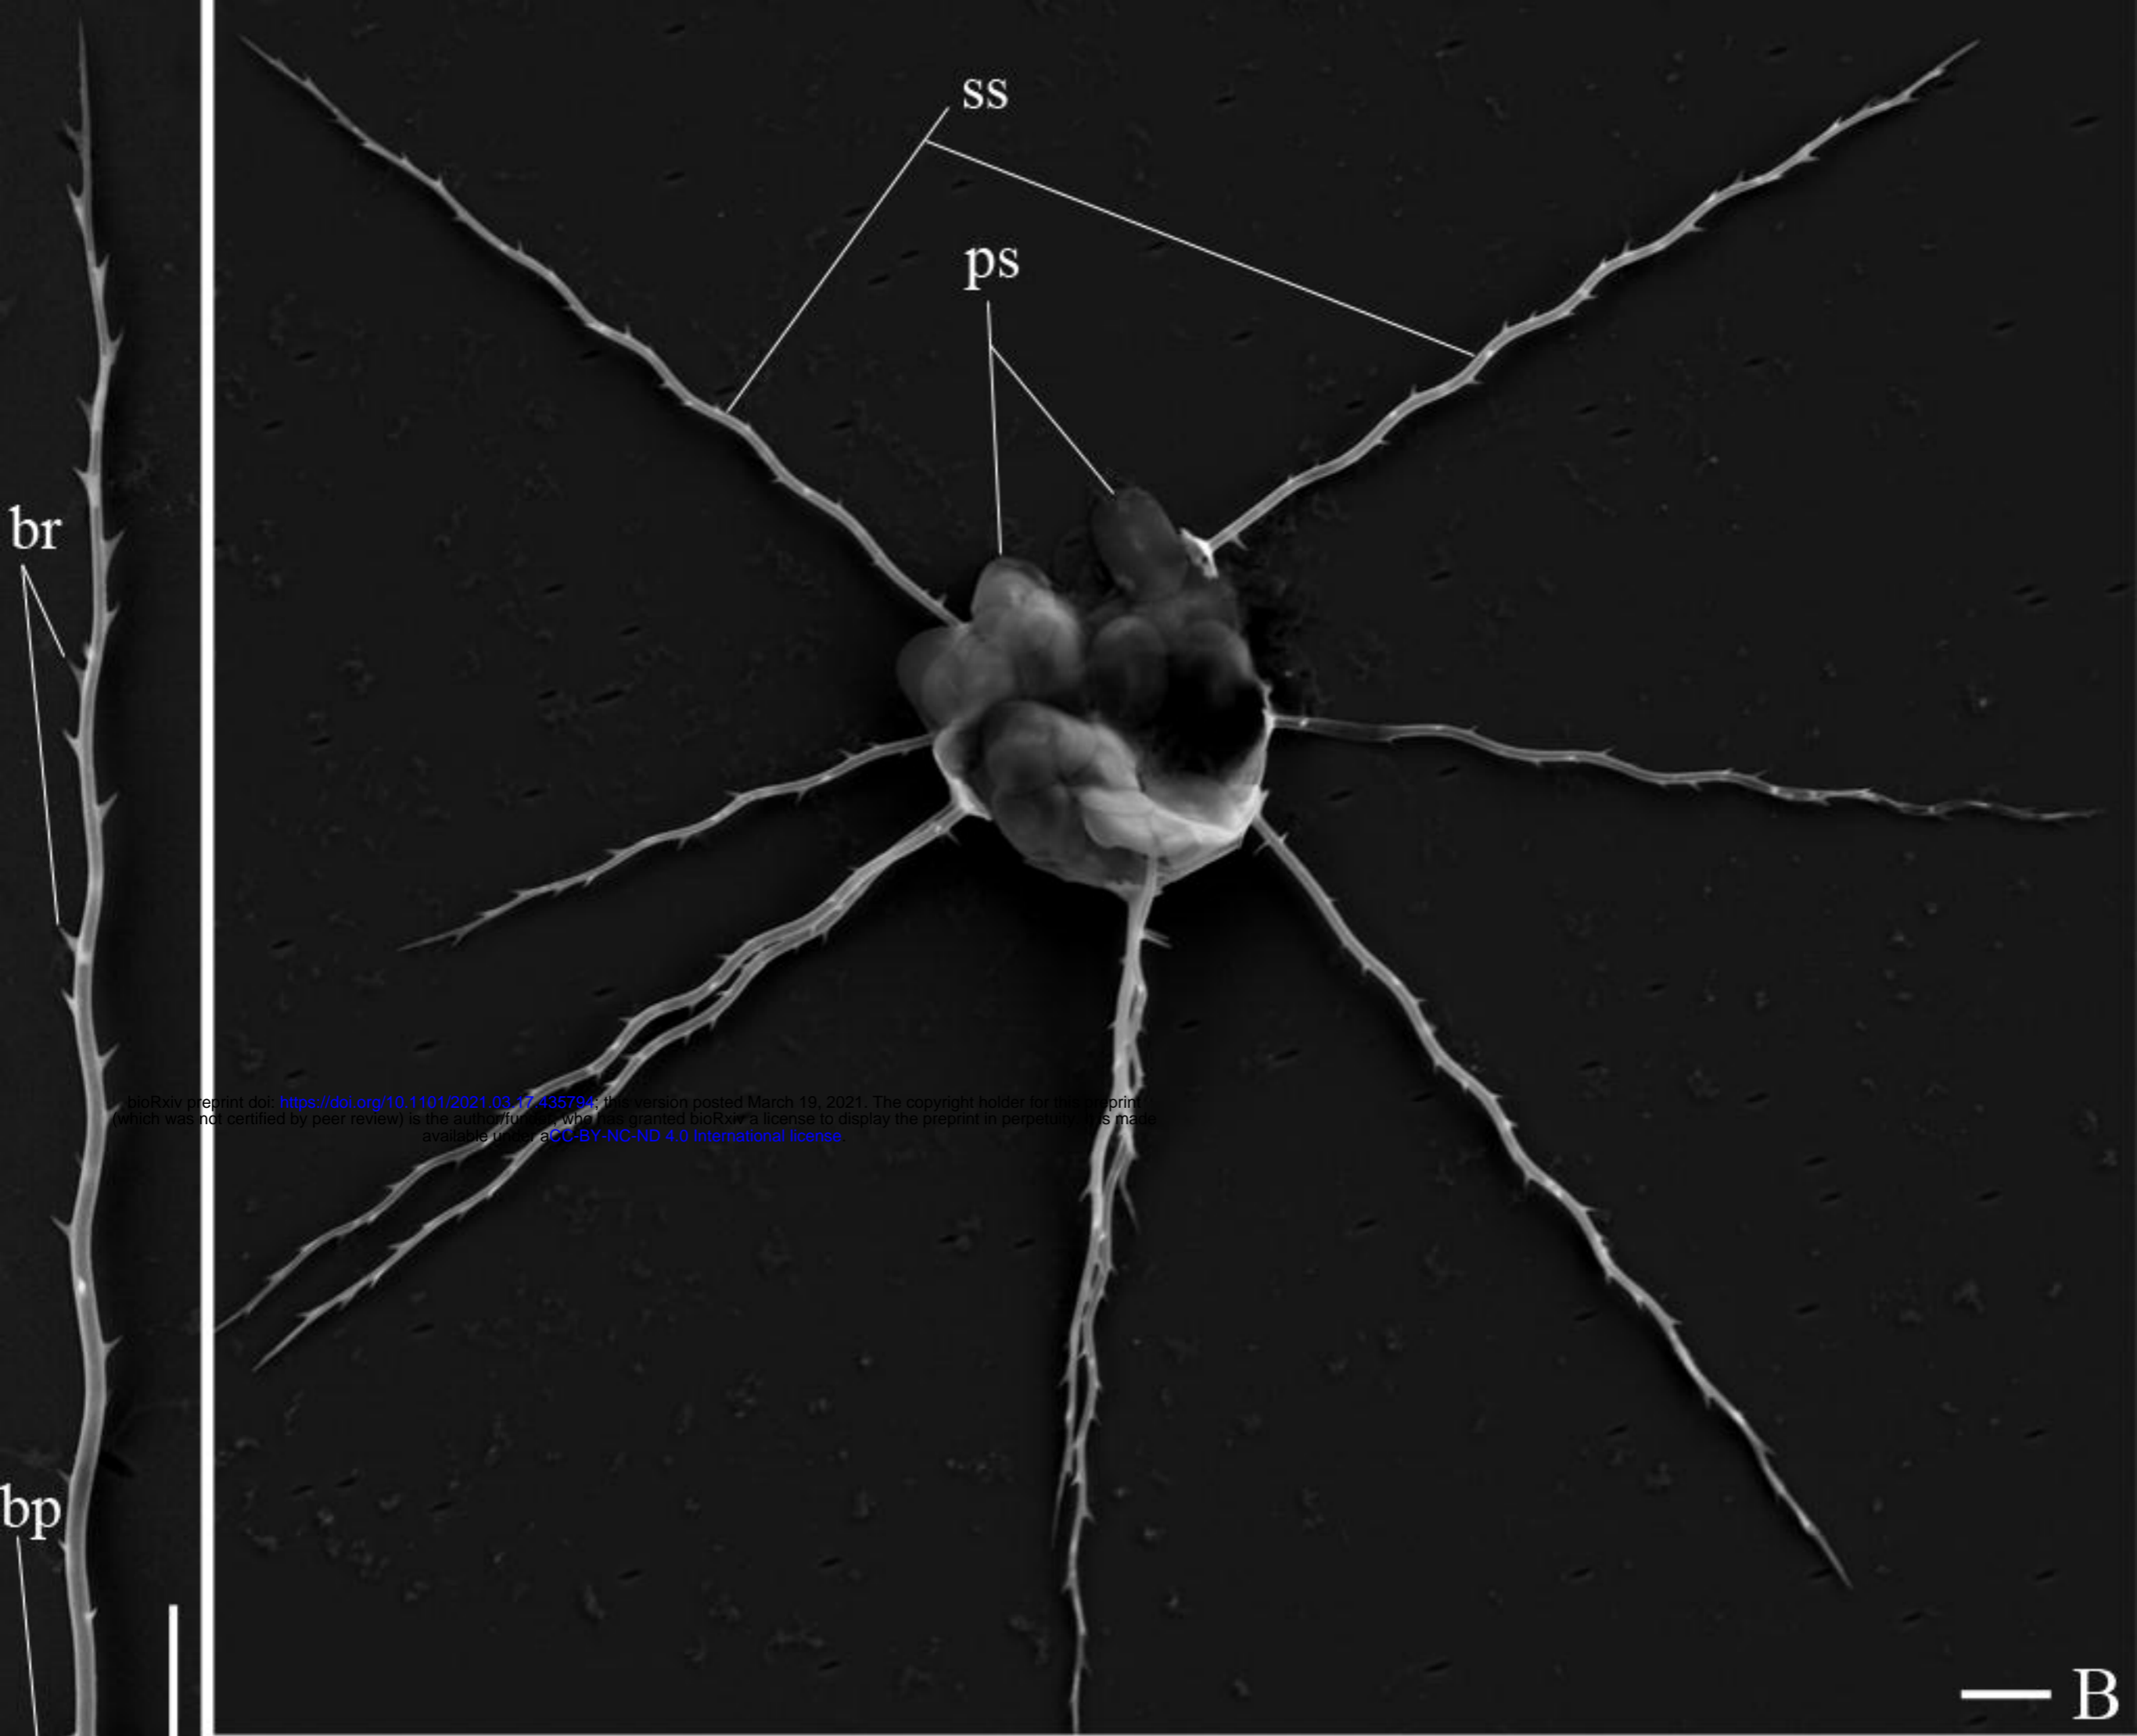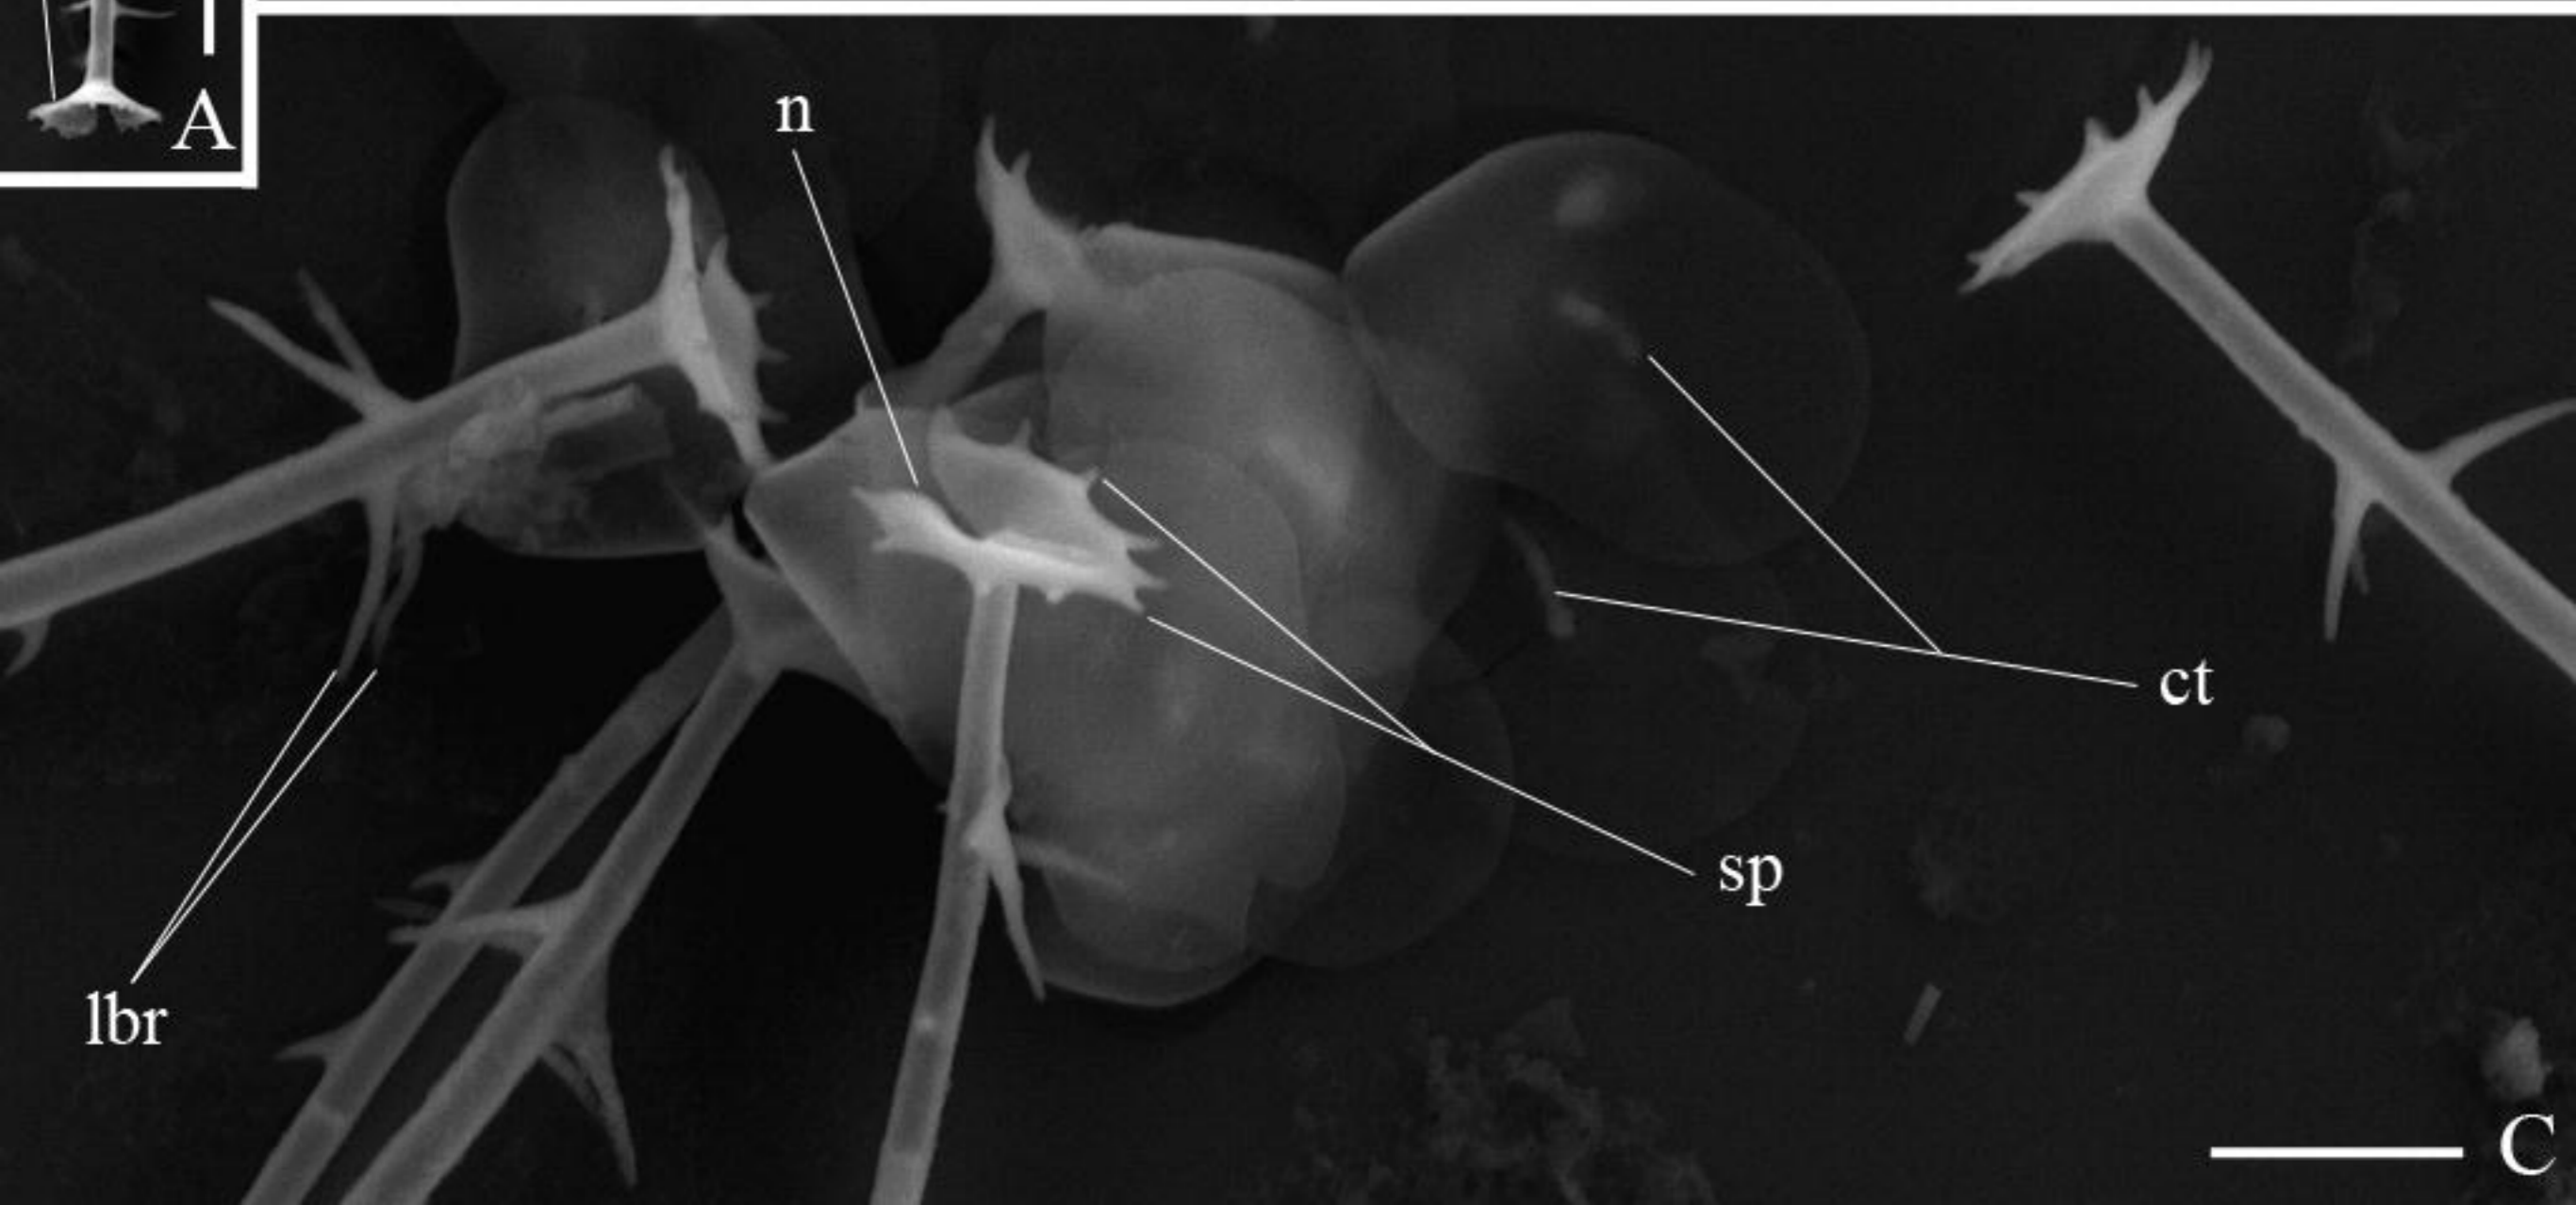

bioRxiv preprint doi: <https://doi.org/10.1101/2021.03.17.435794>; this version posted March 19, 2021. The copyright holder for this preprint (which was not certified by peer review) is the author/funder, who has granted bioRxiv a license to display the preprint in perpetuity. It is made available under aCC-BY-NC-ND 4.0 International license.

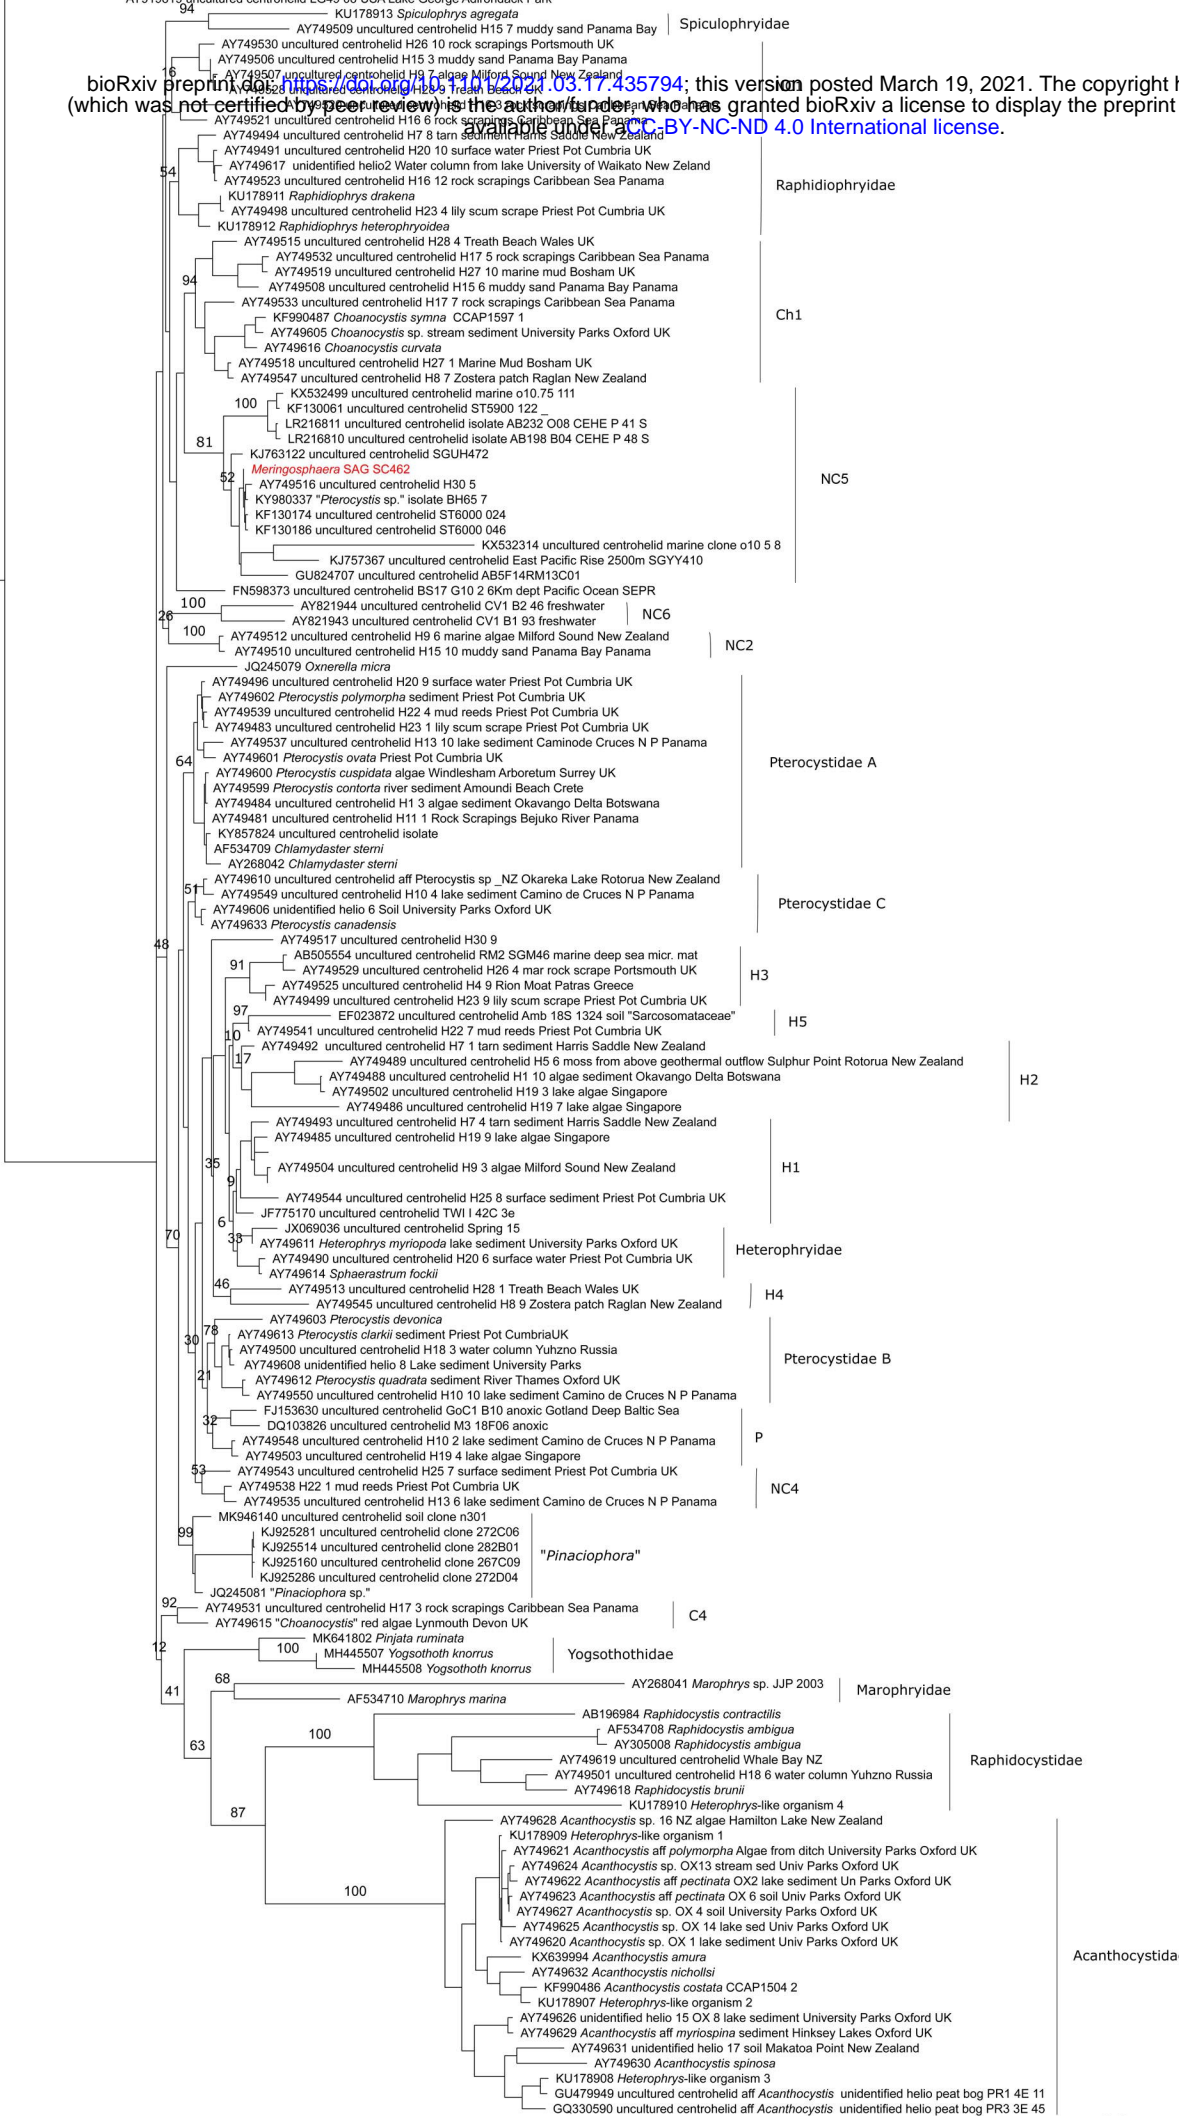

55



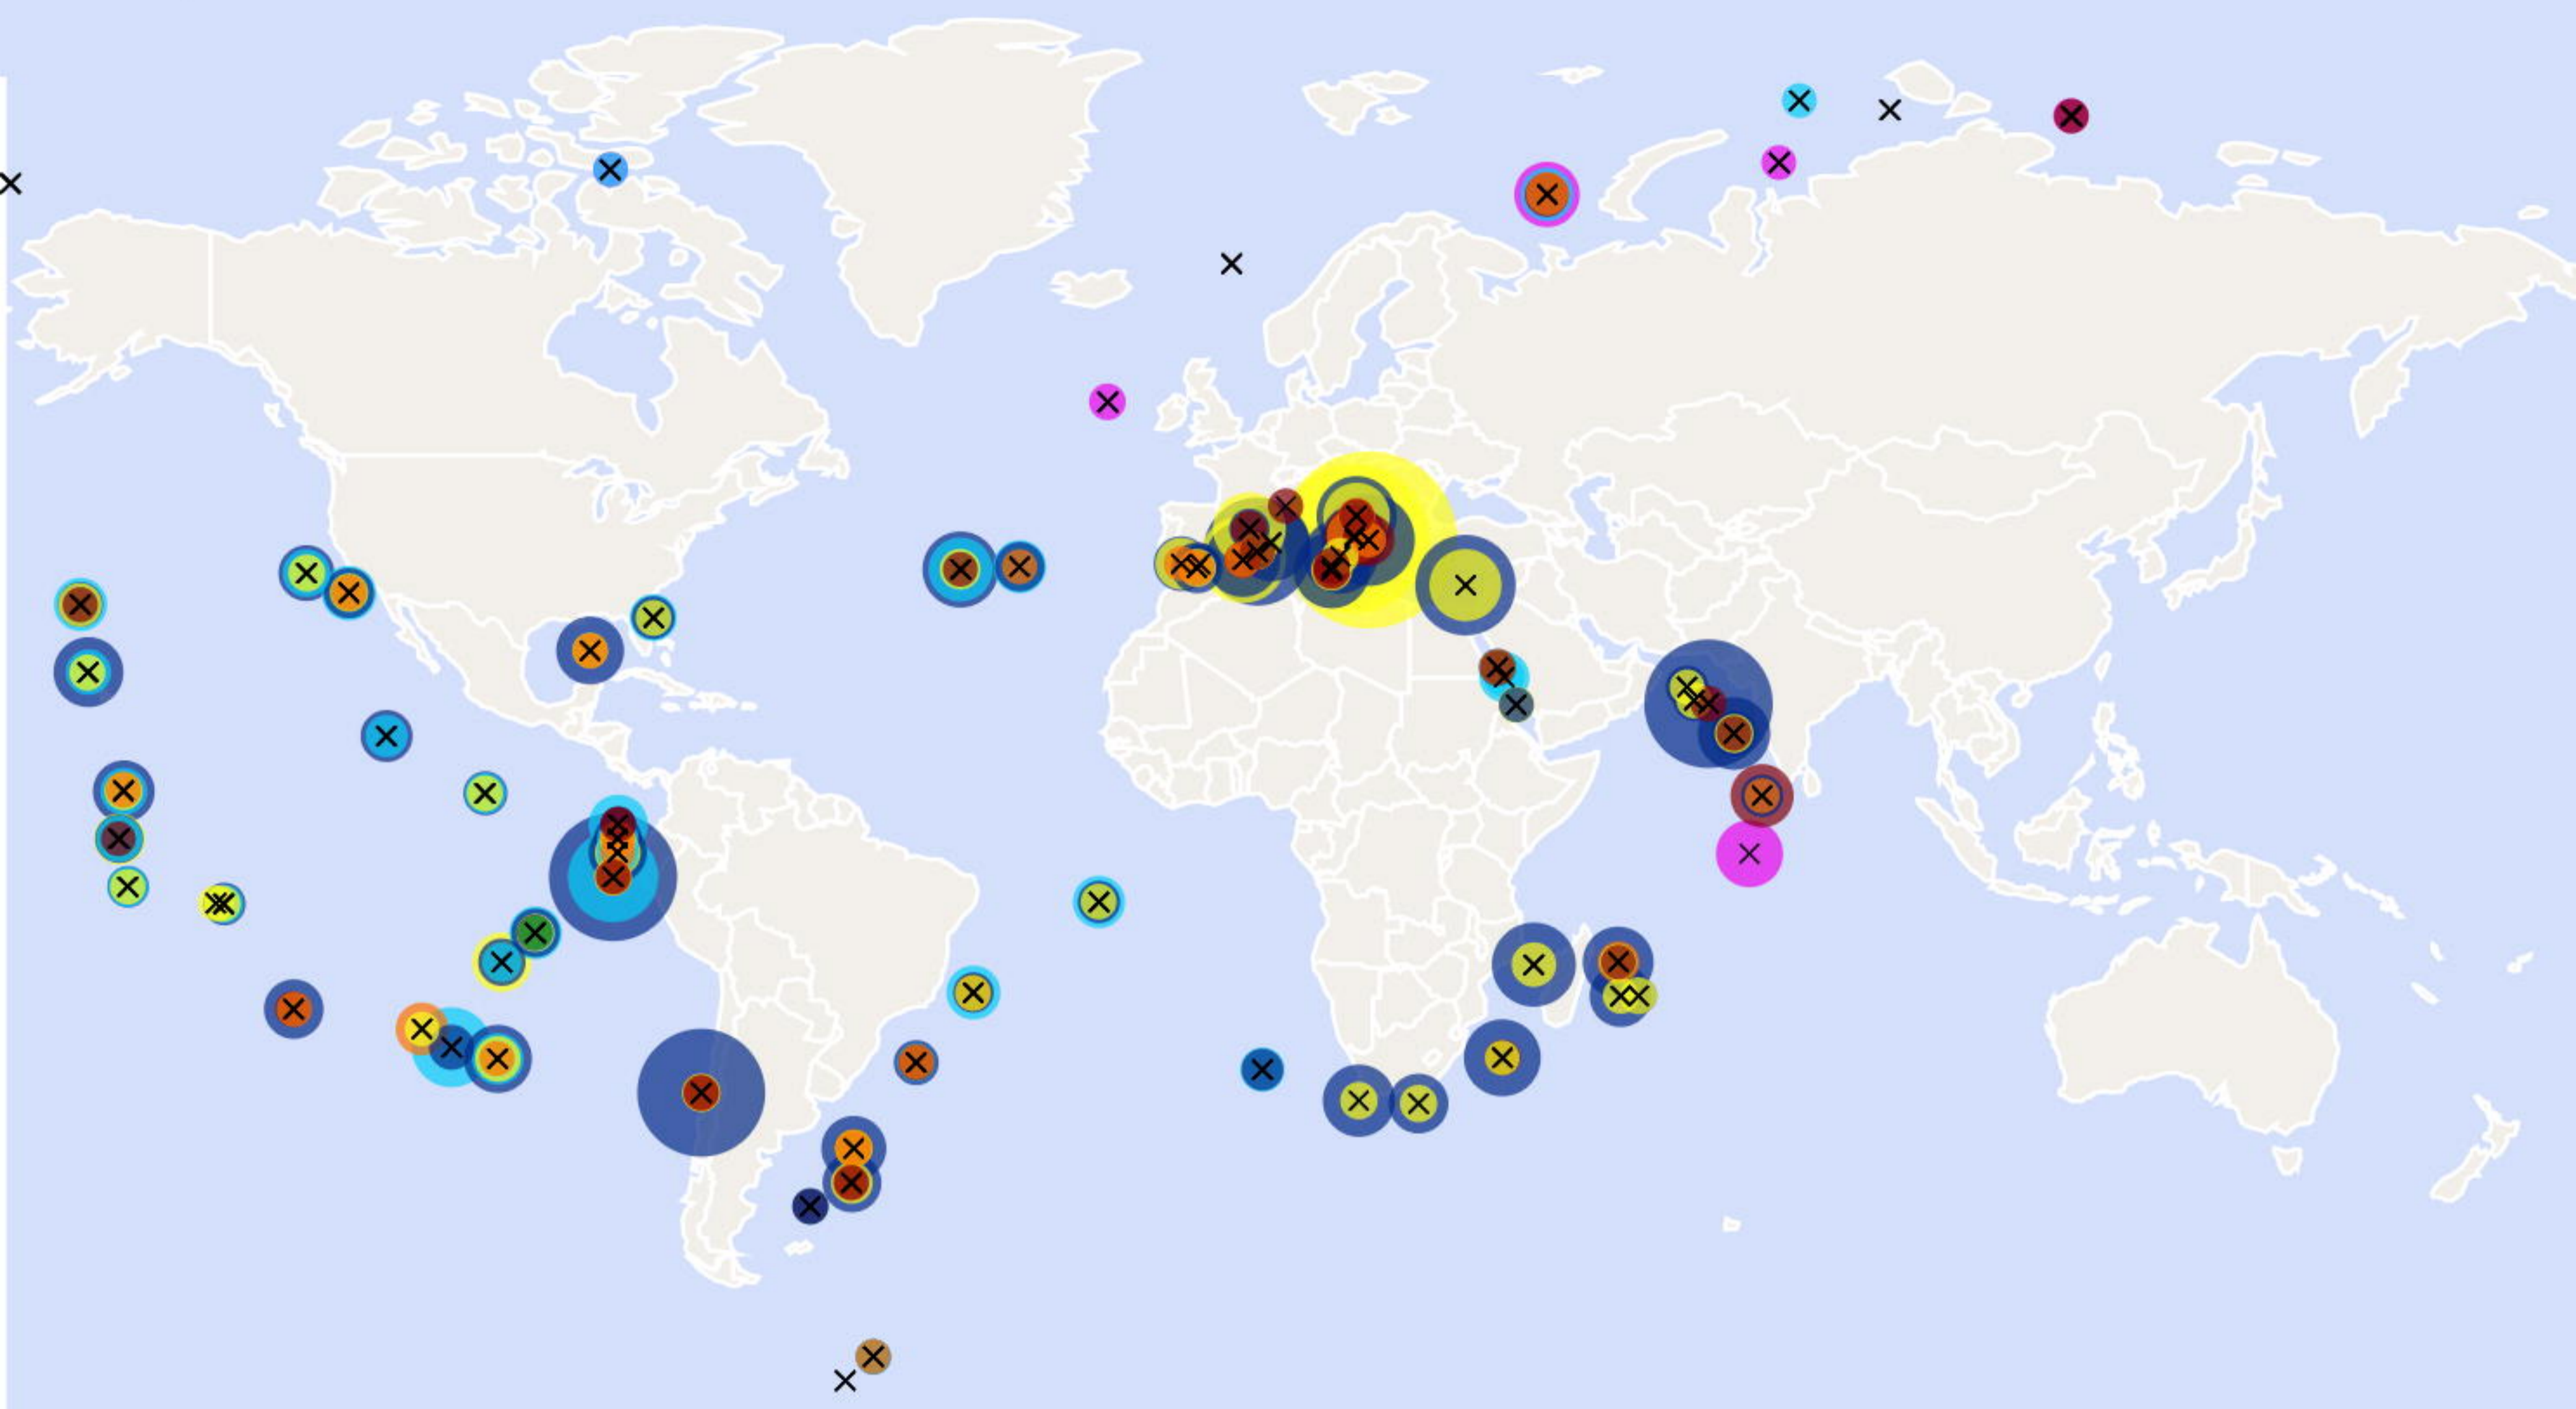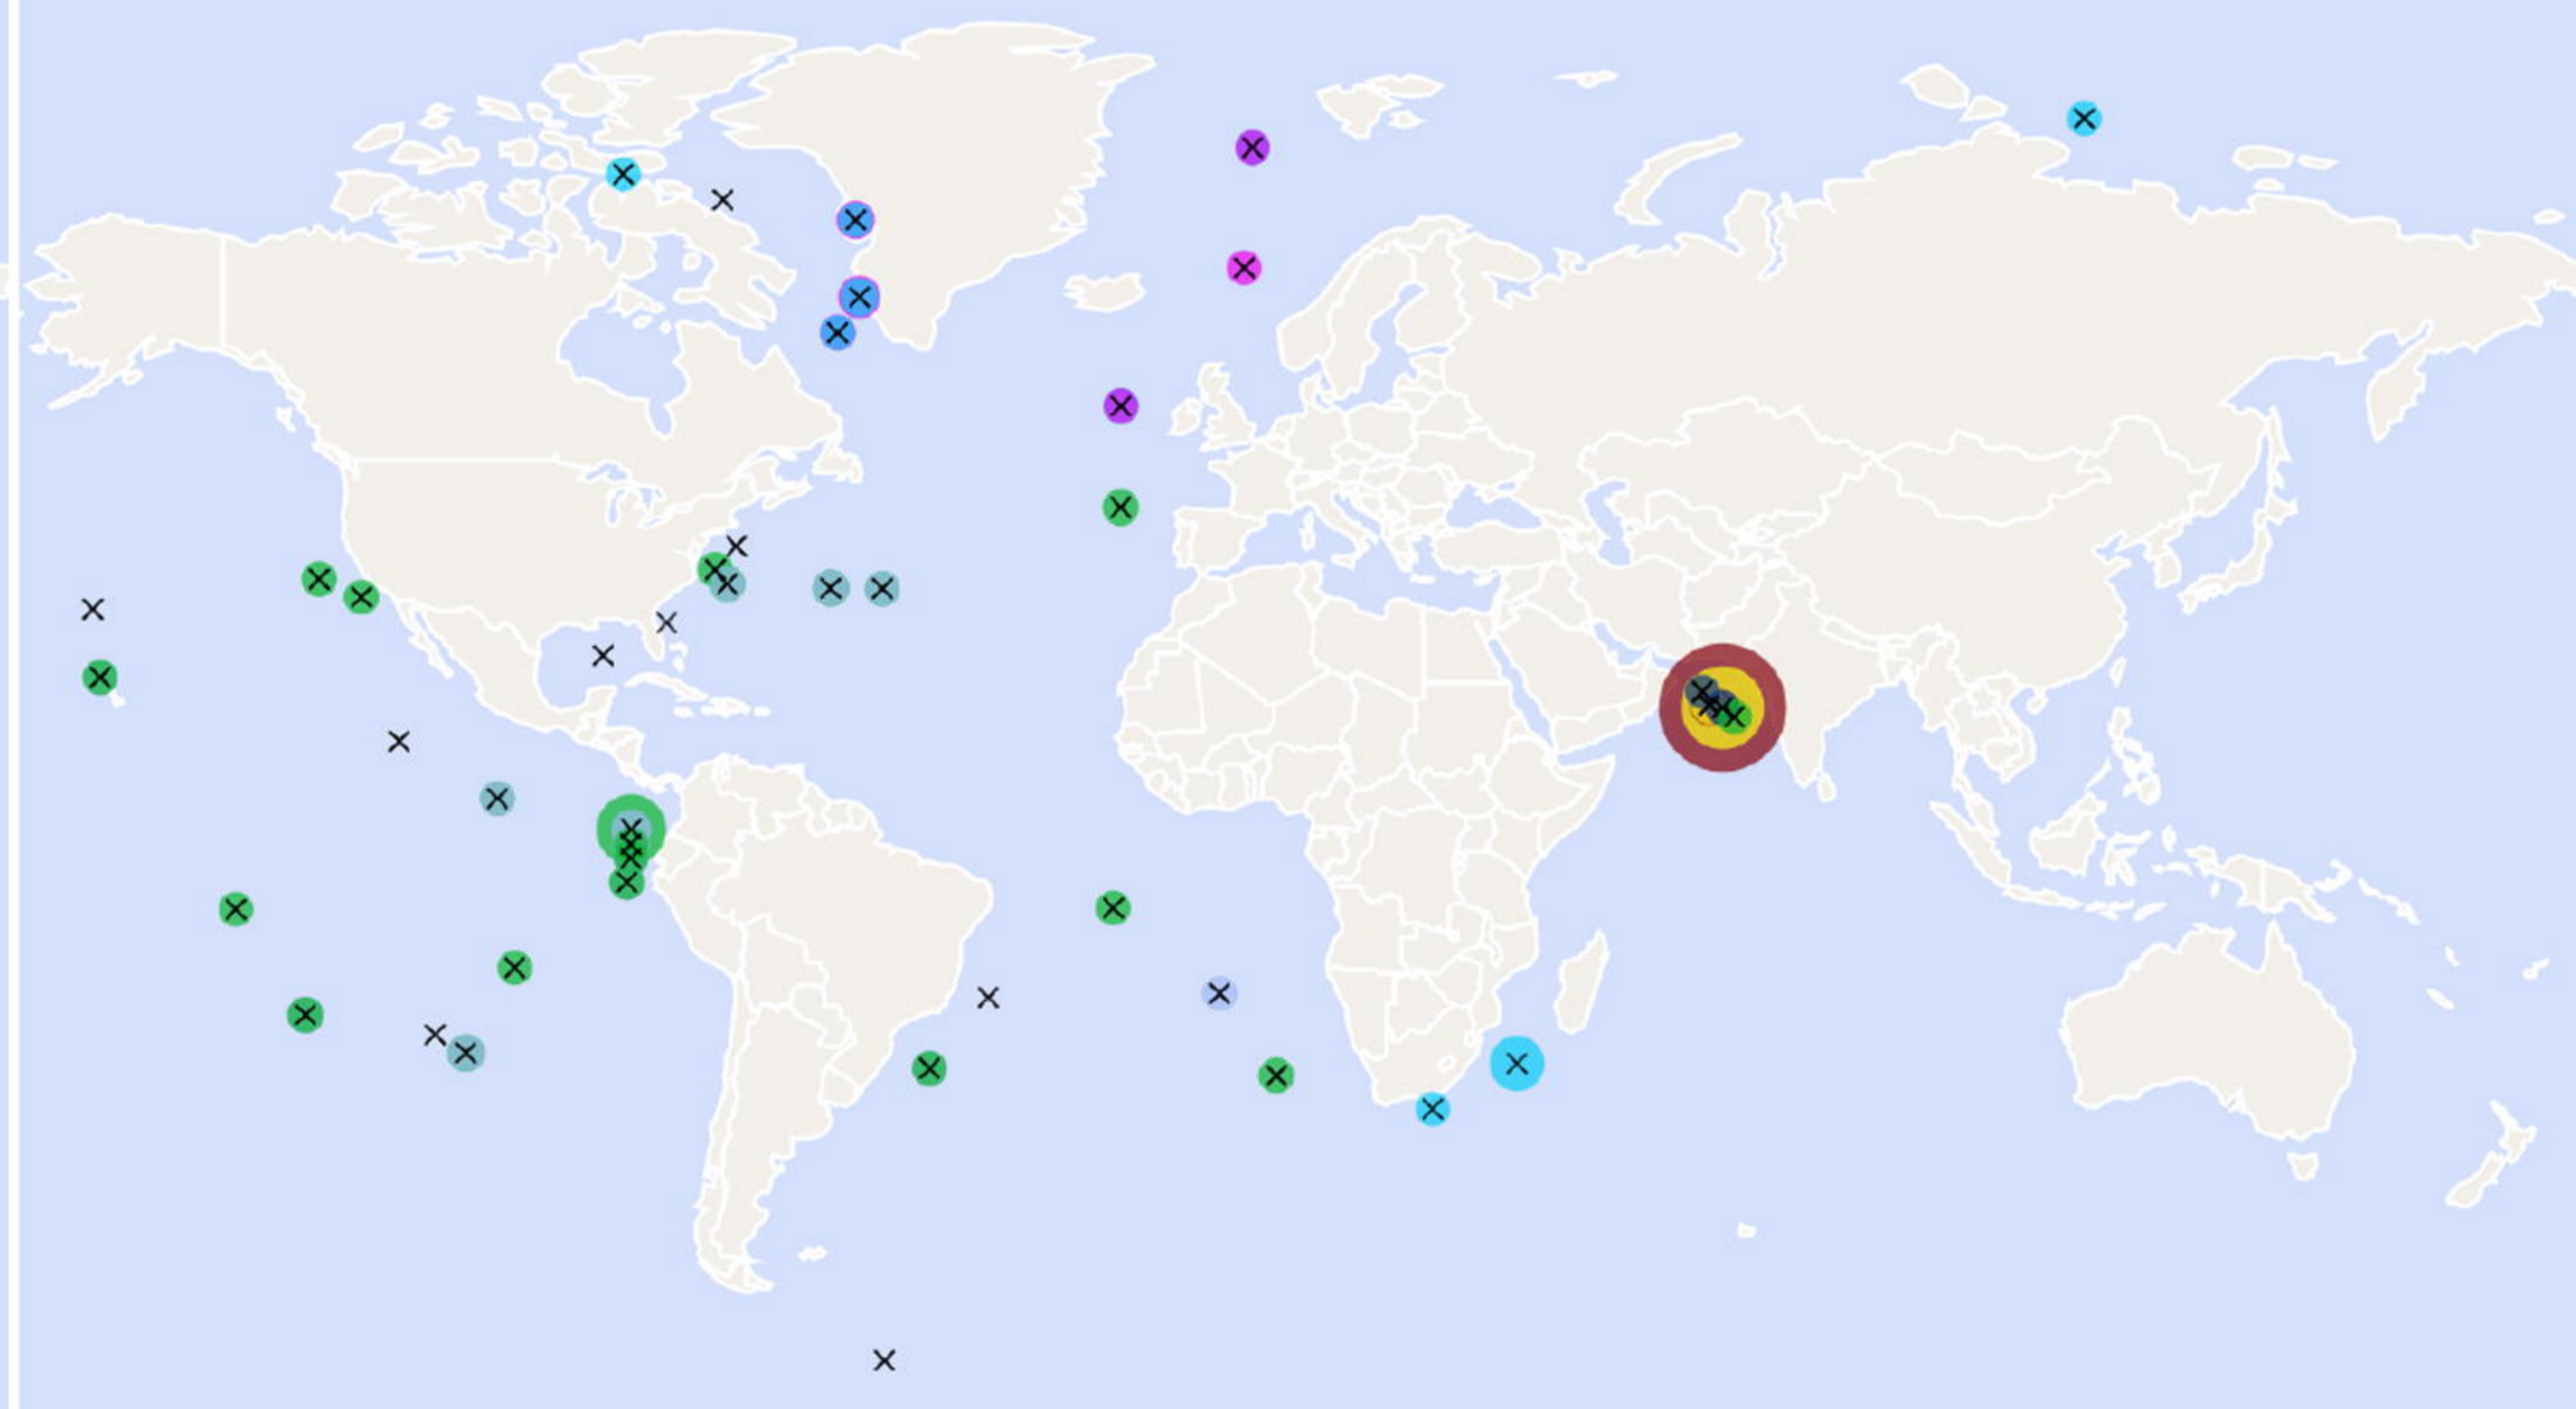

DCM

MES

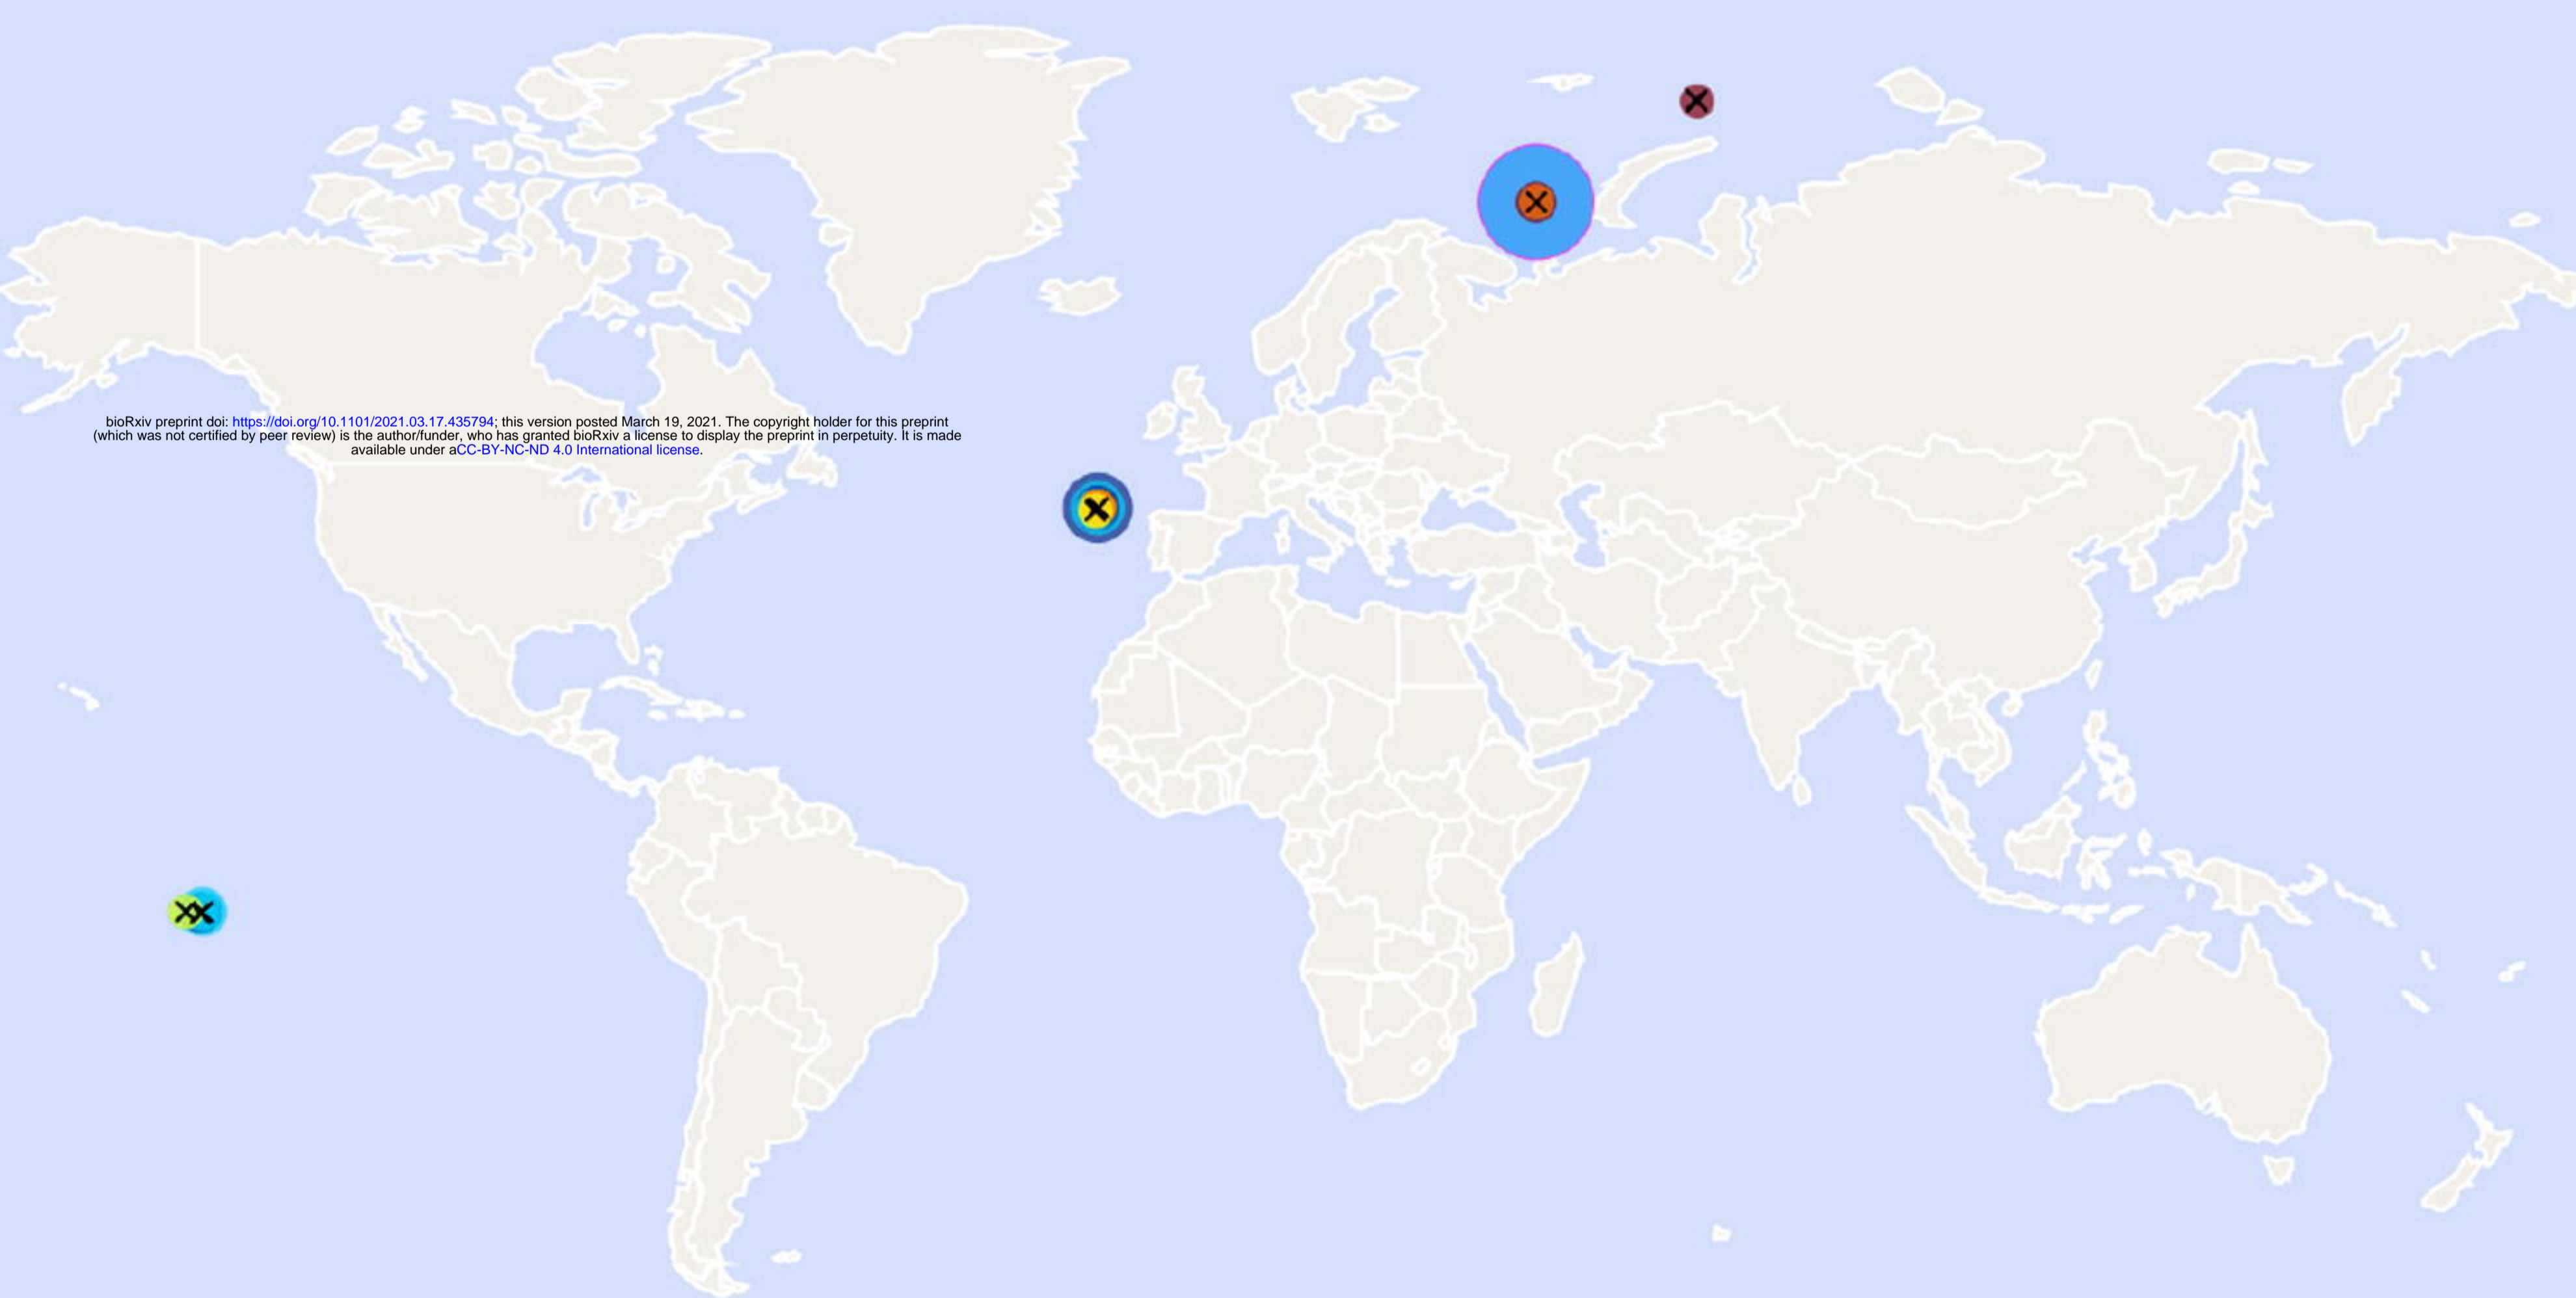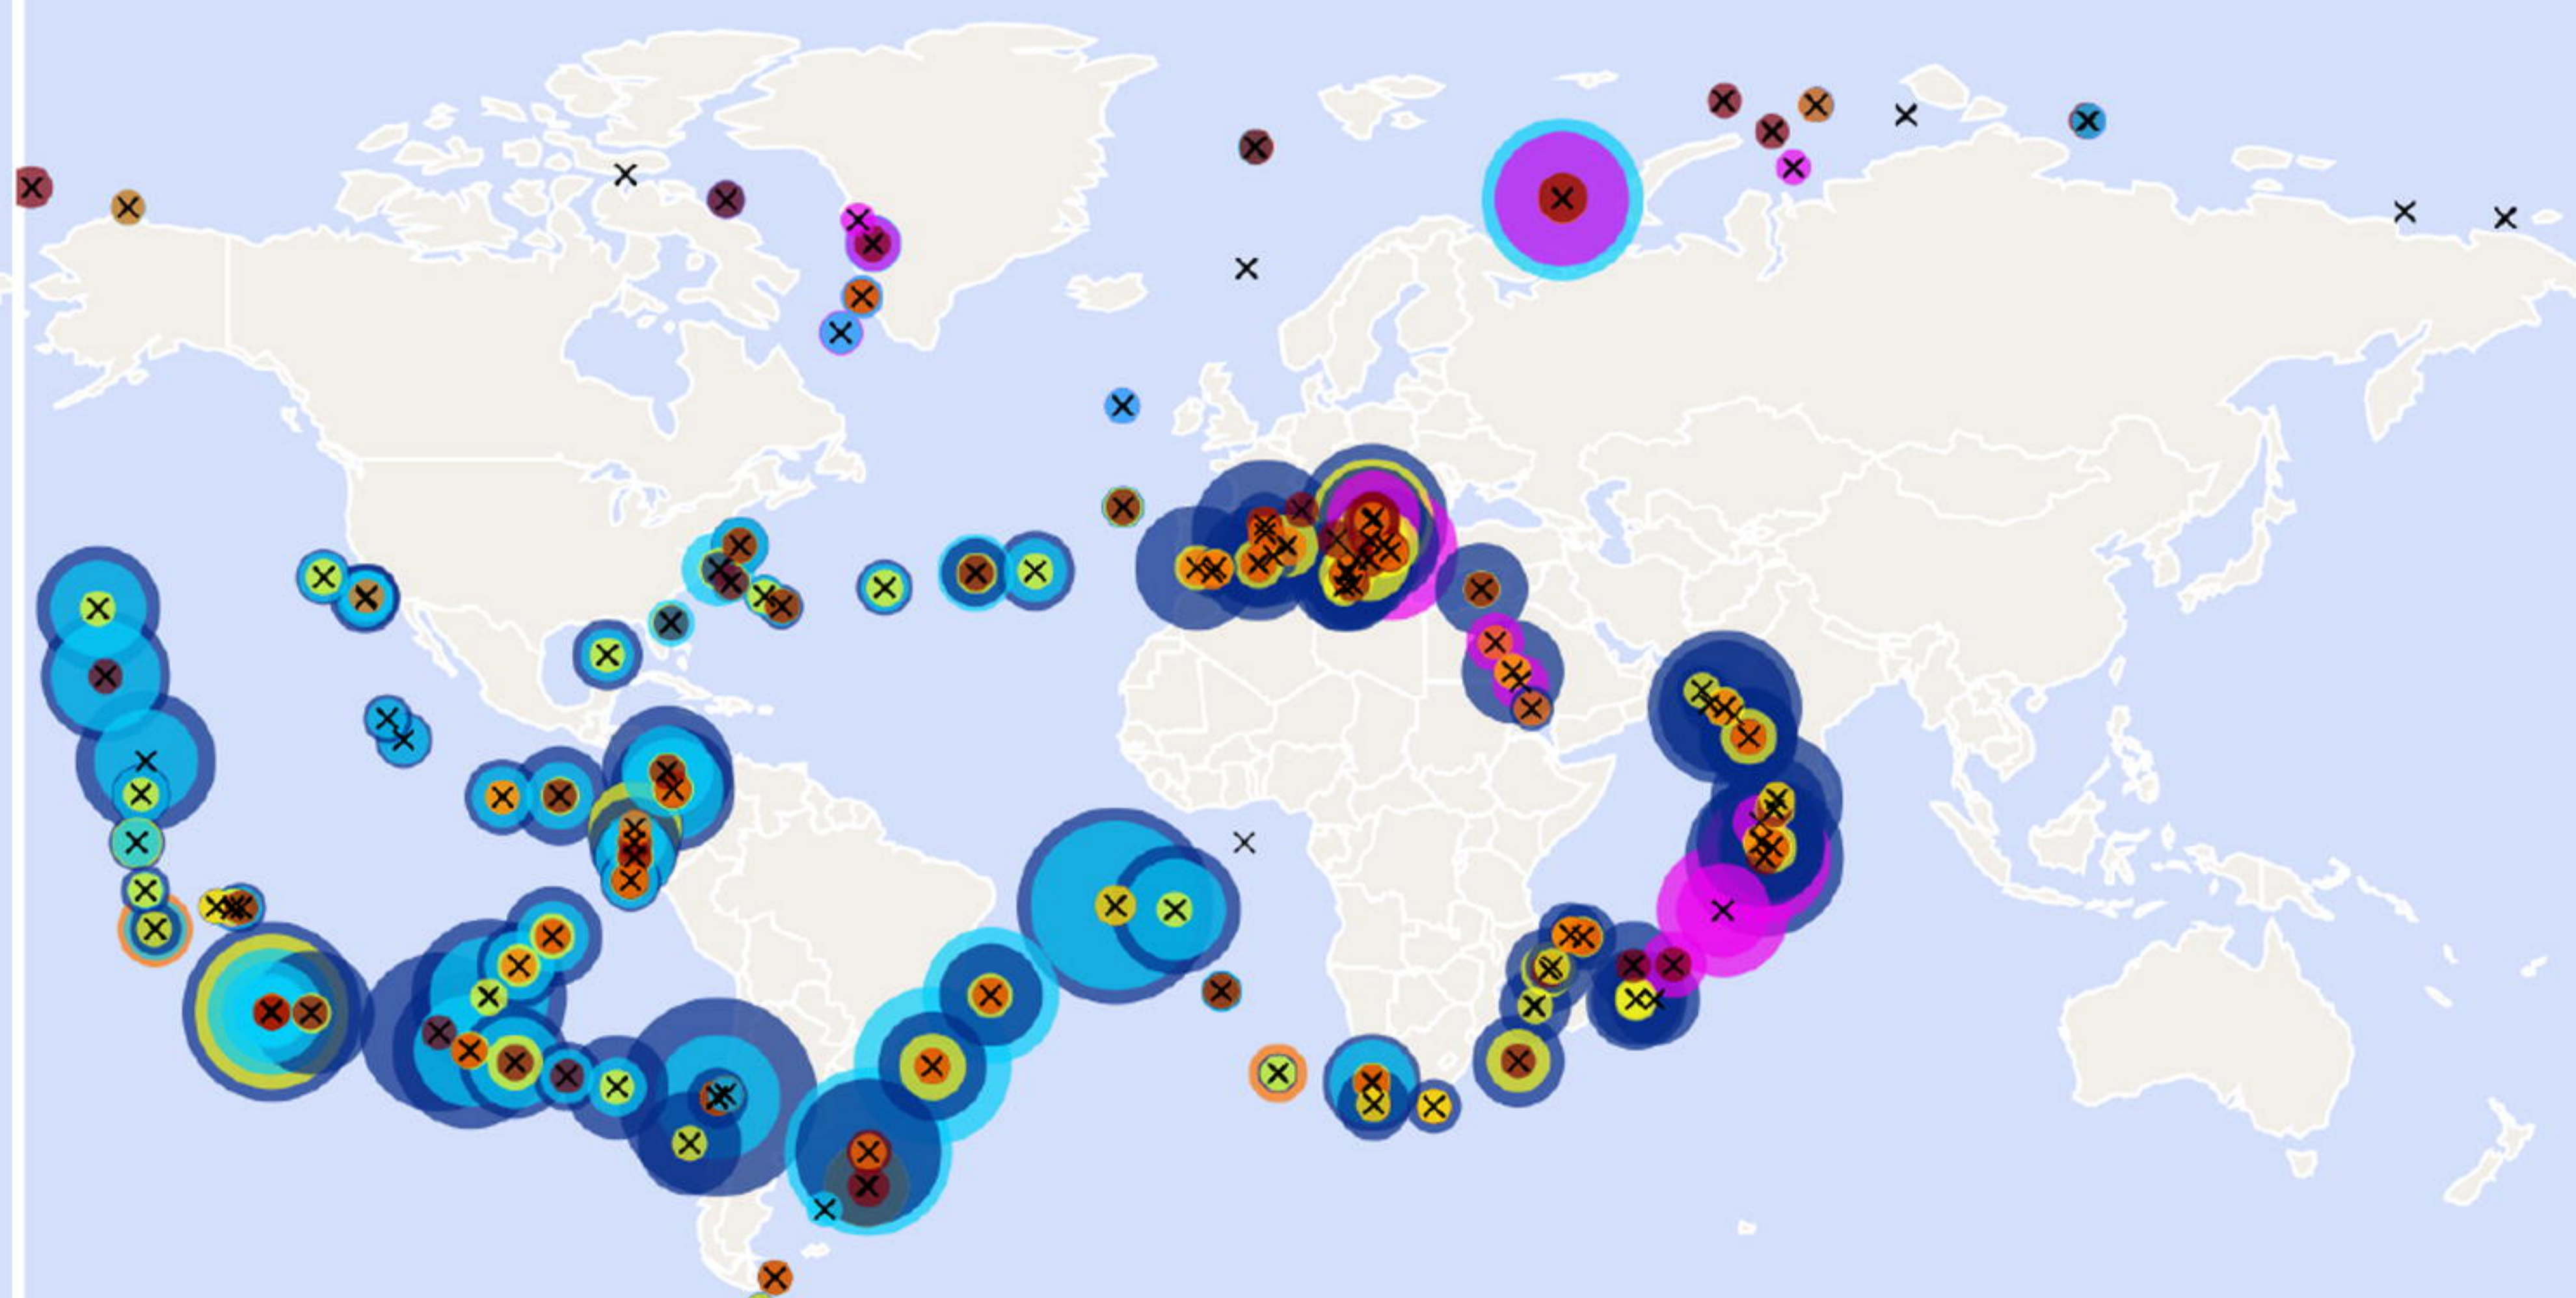

MIX

SRF

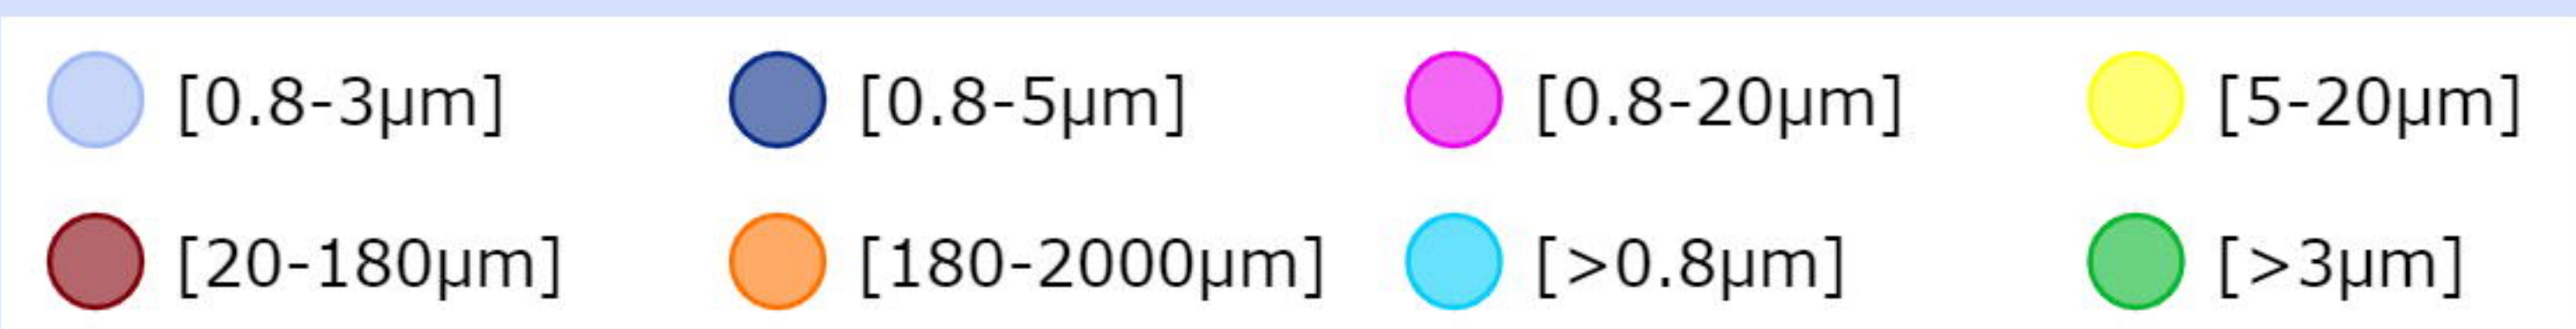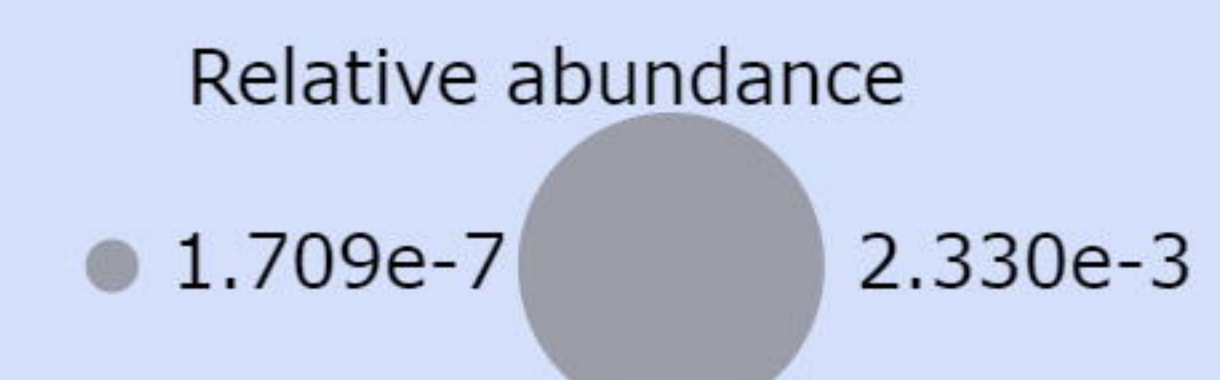

bioRxiv preprint doi: <https://doi.org/10.1101/2021.03.17.435794>; this version posted March 19, 2021. The copyright holder for this preprint (which was not certified by peer review) is the author/funder, who has granted bioRxiv a license to display the preprint in perpetuity. It is made available under aCC-BY-NC-ND 4.0 International license.



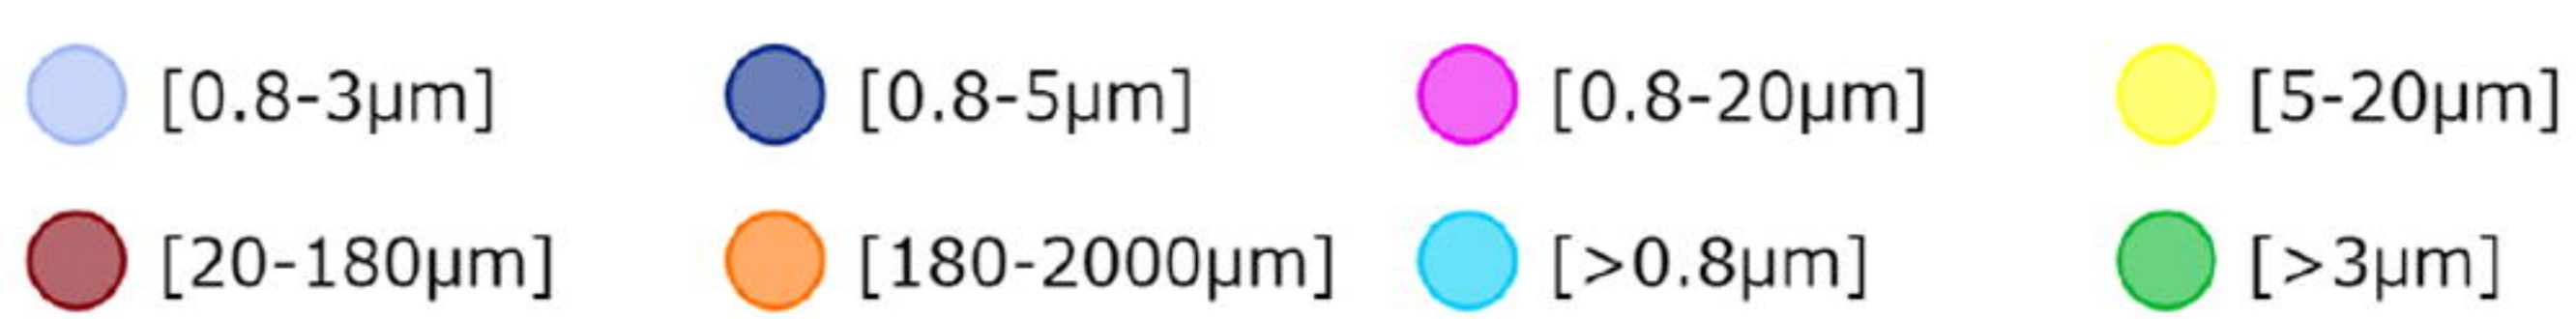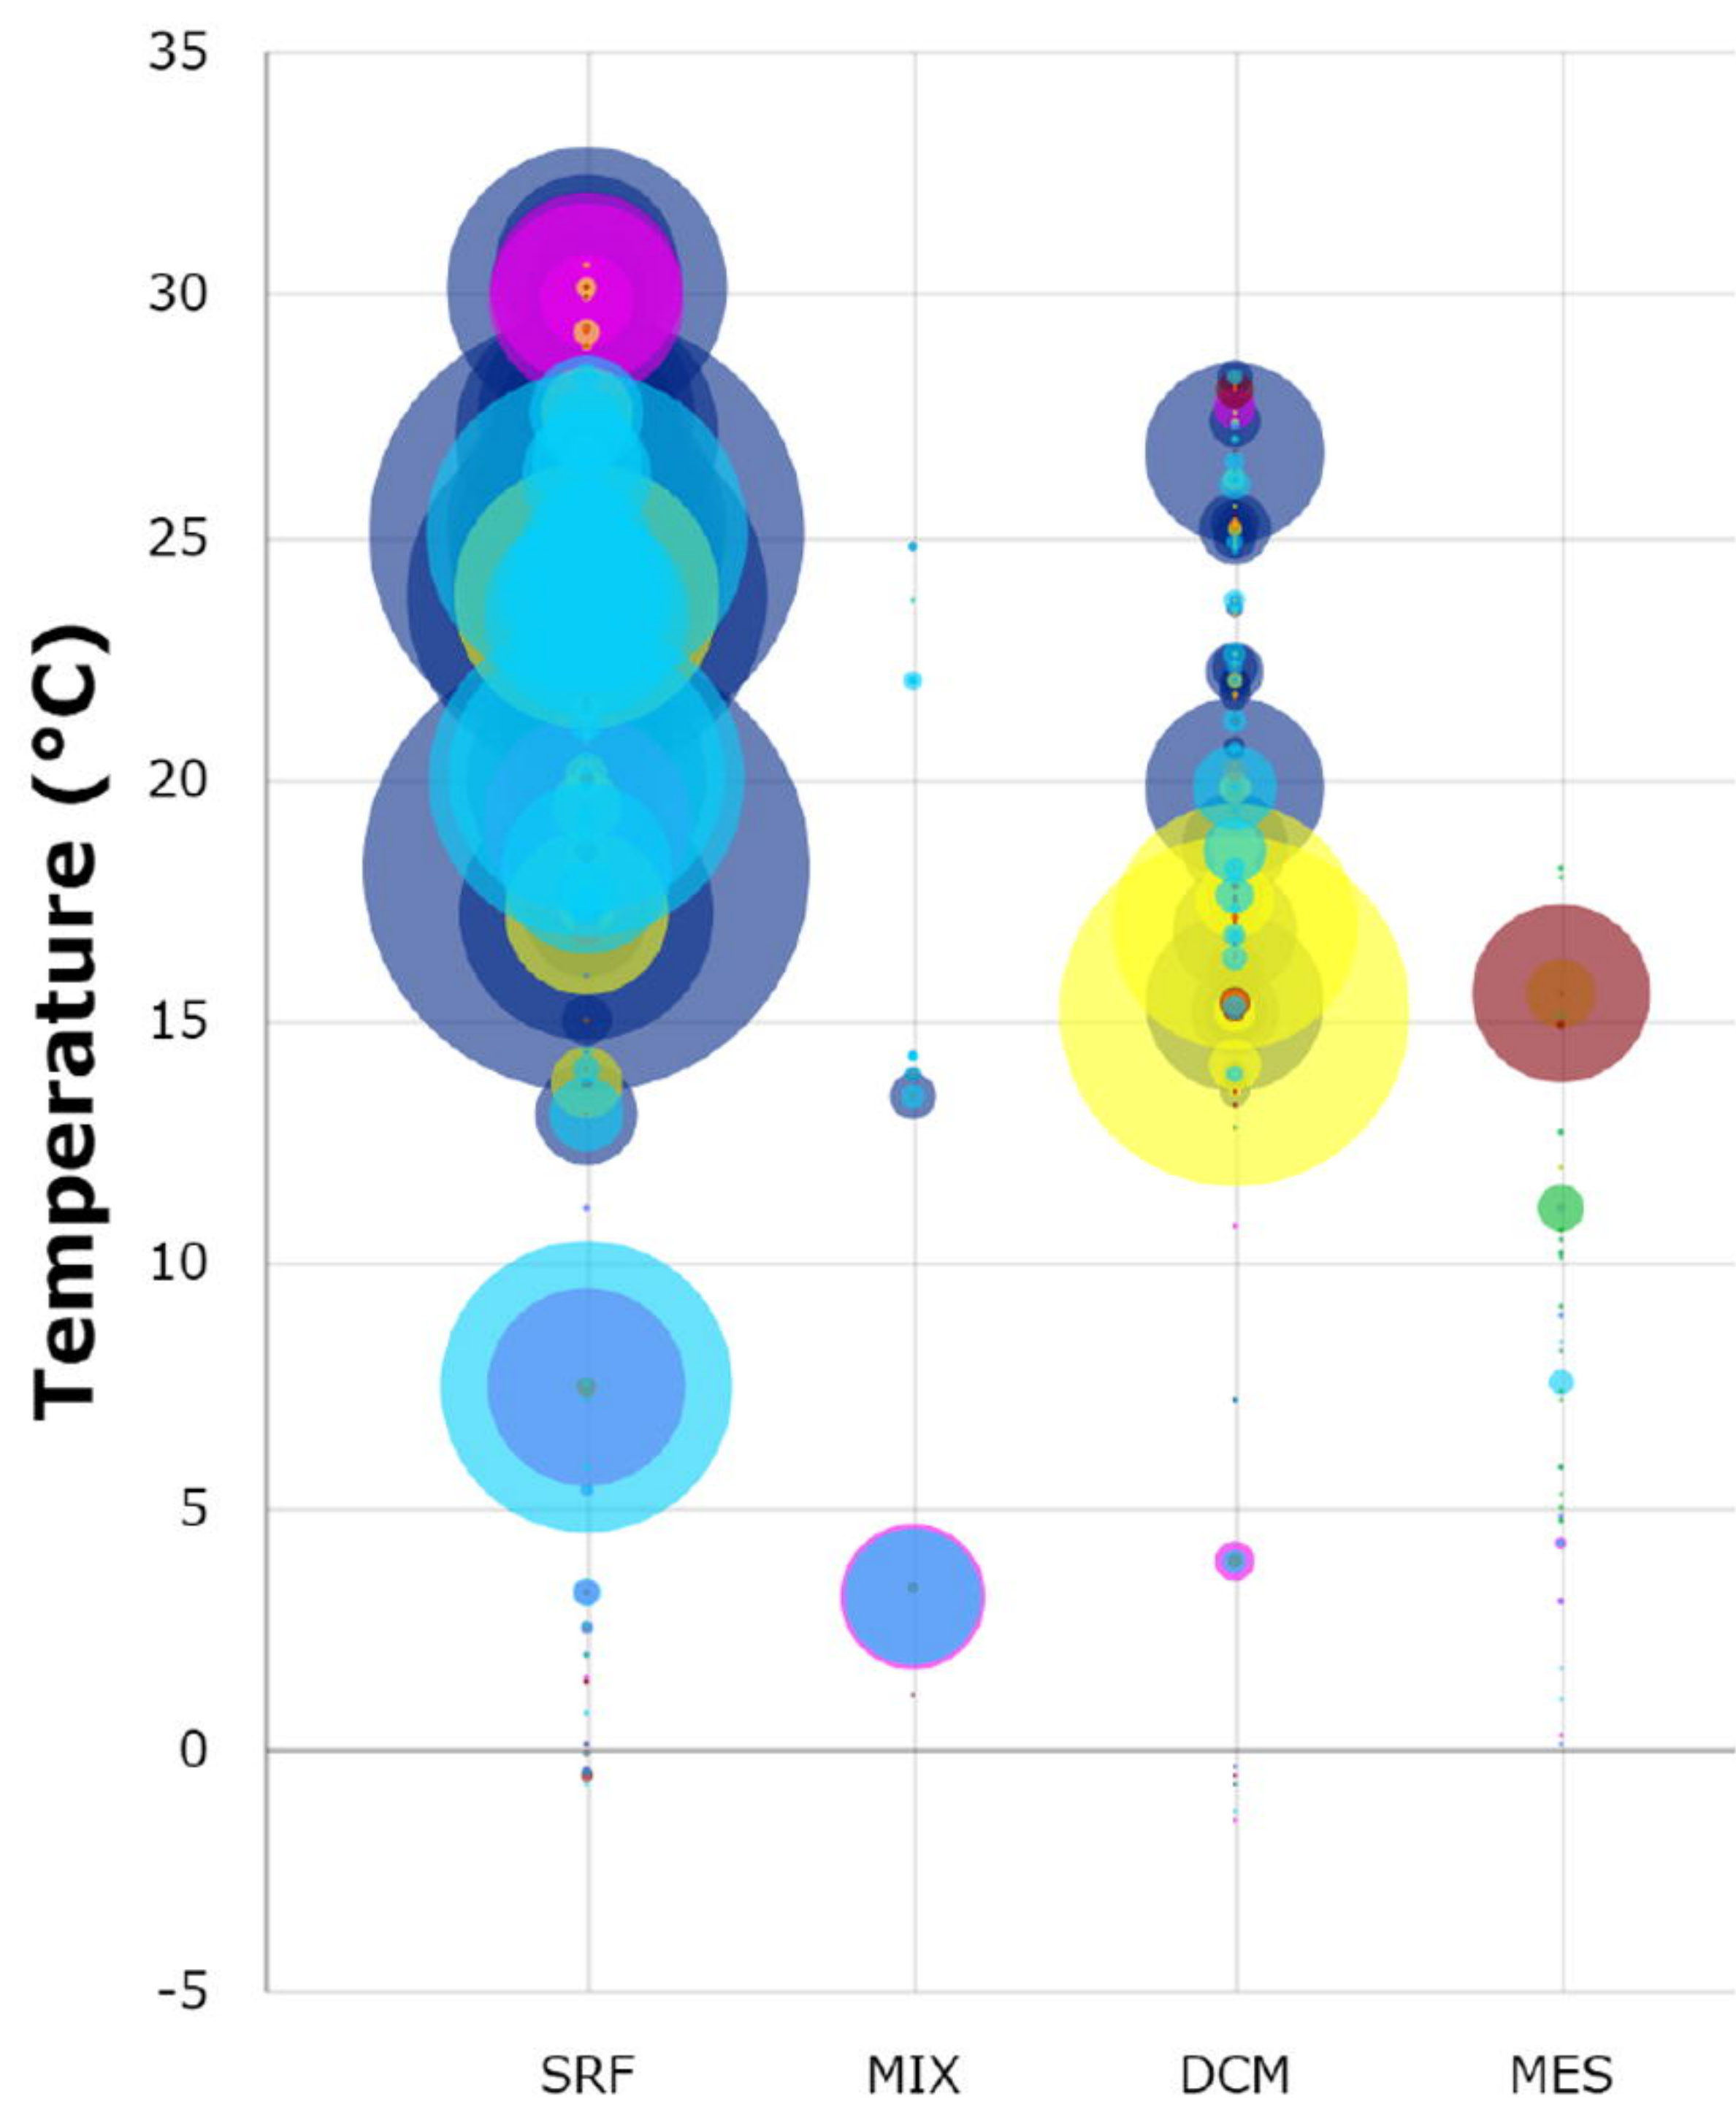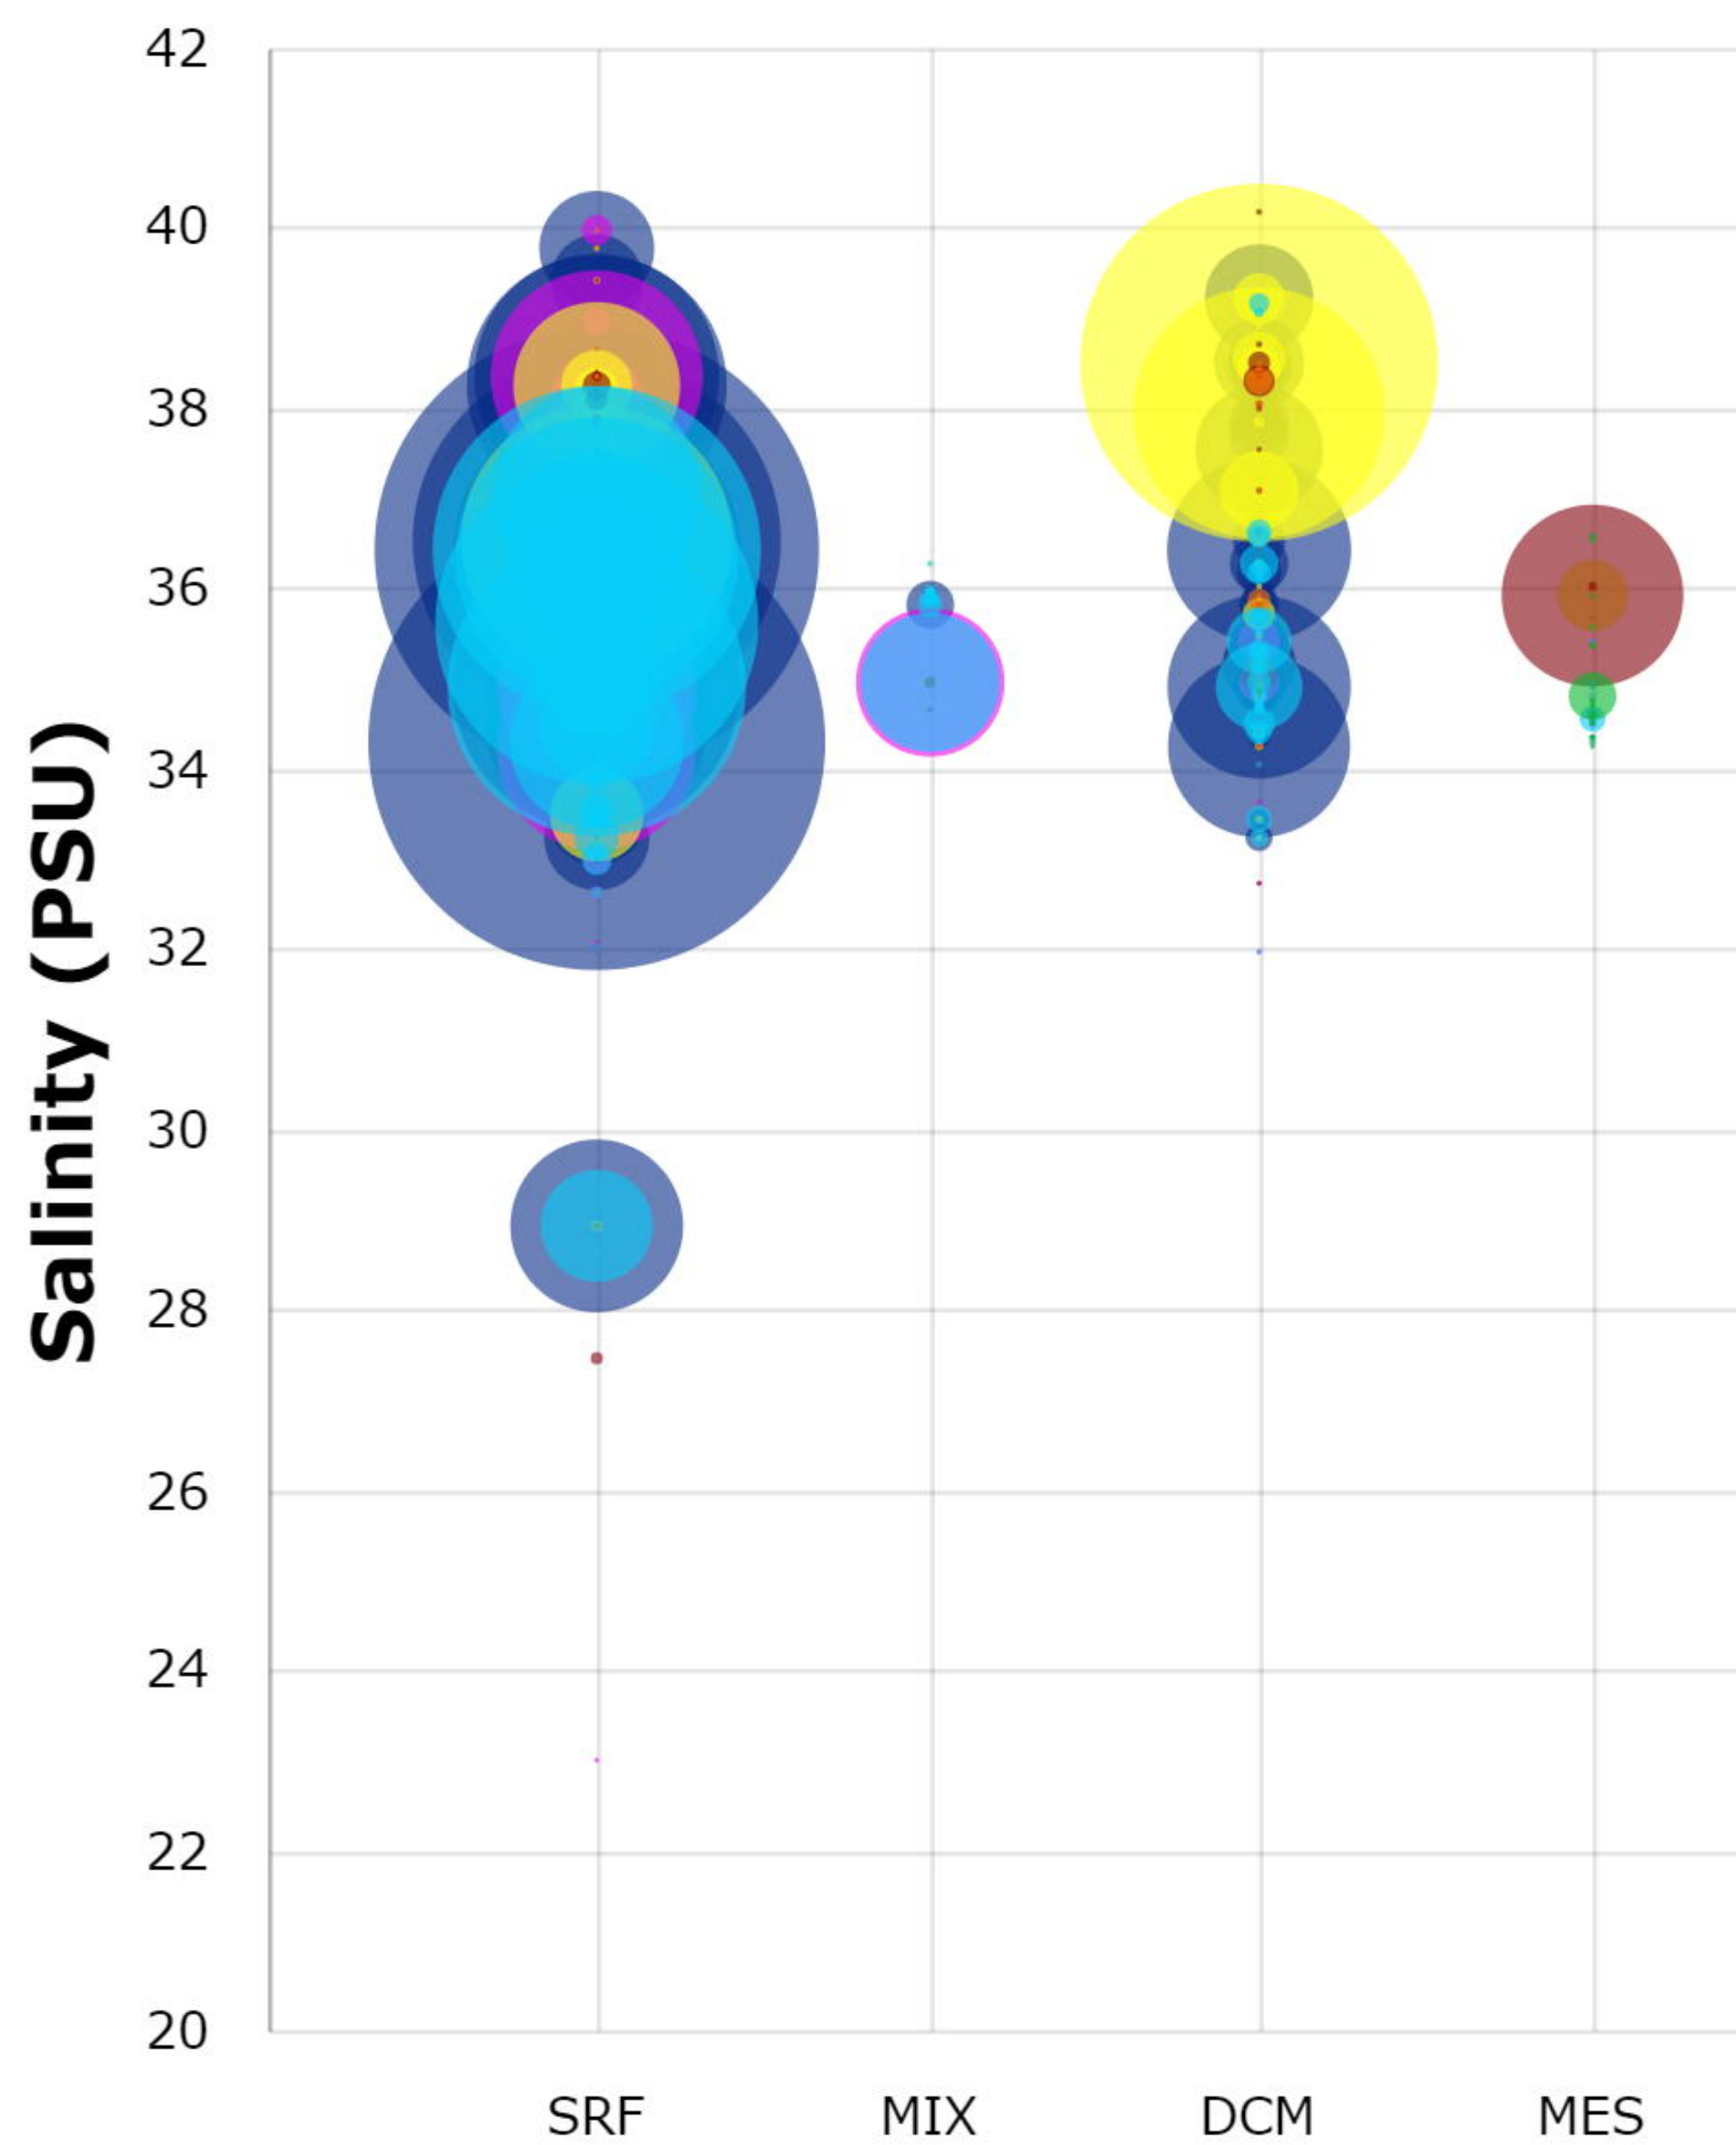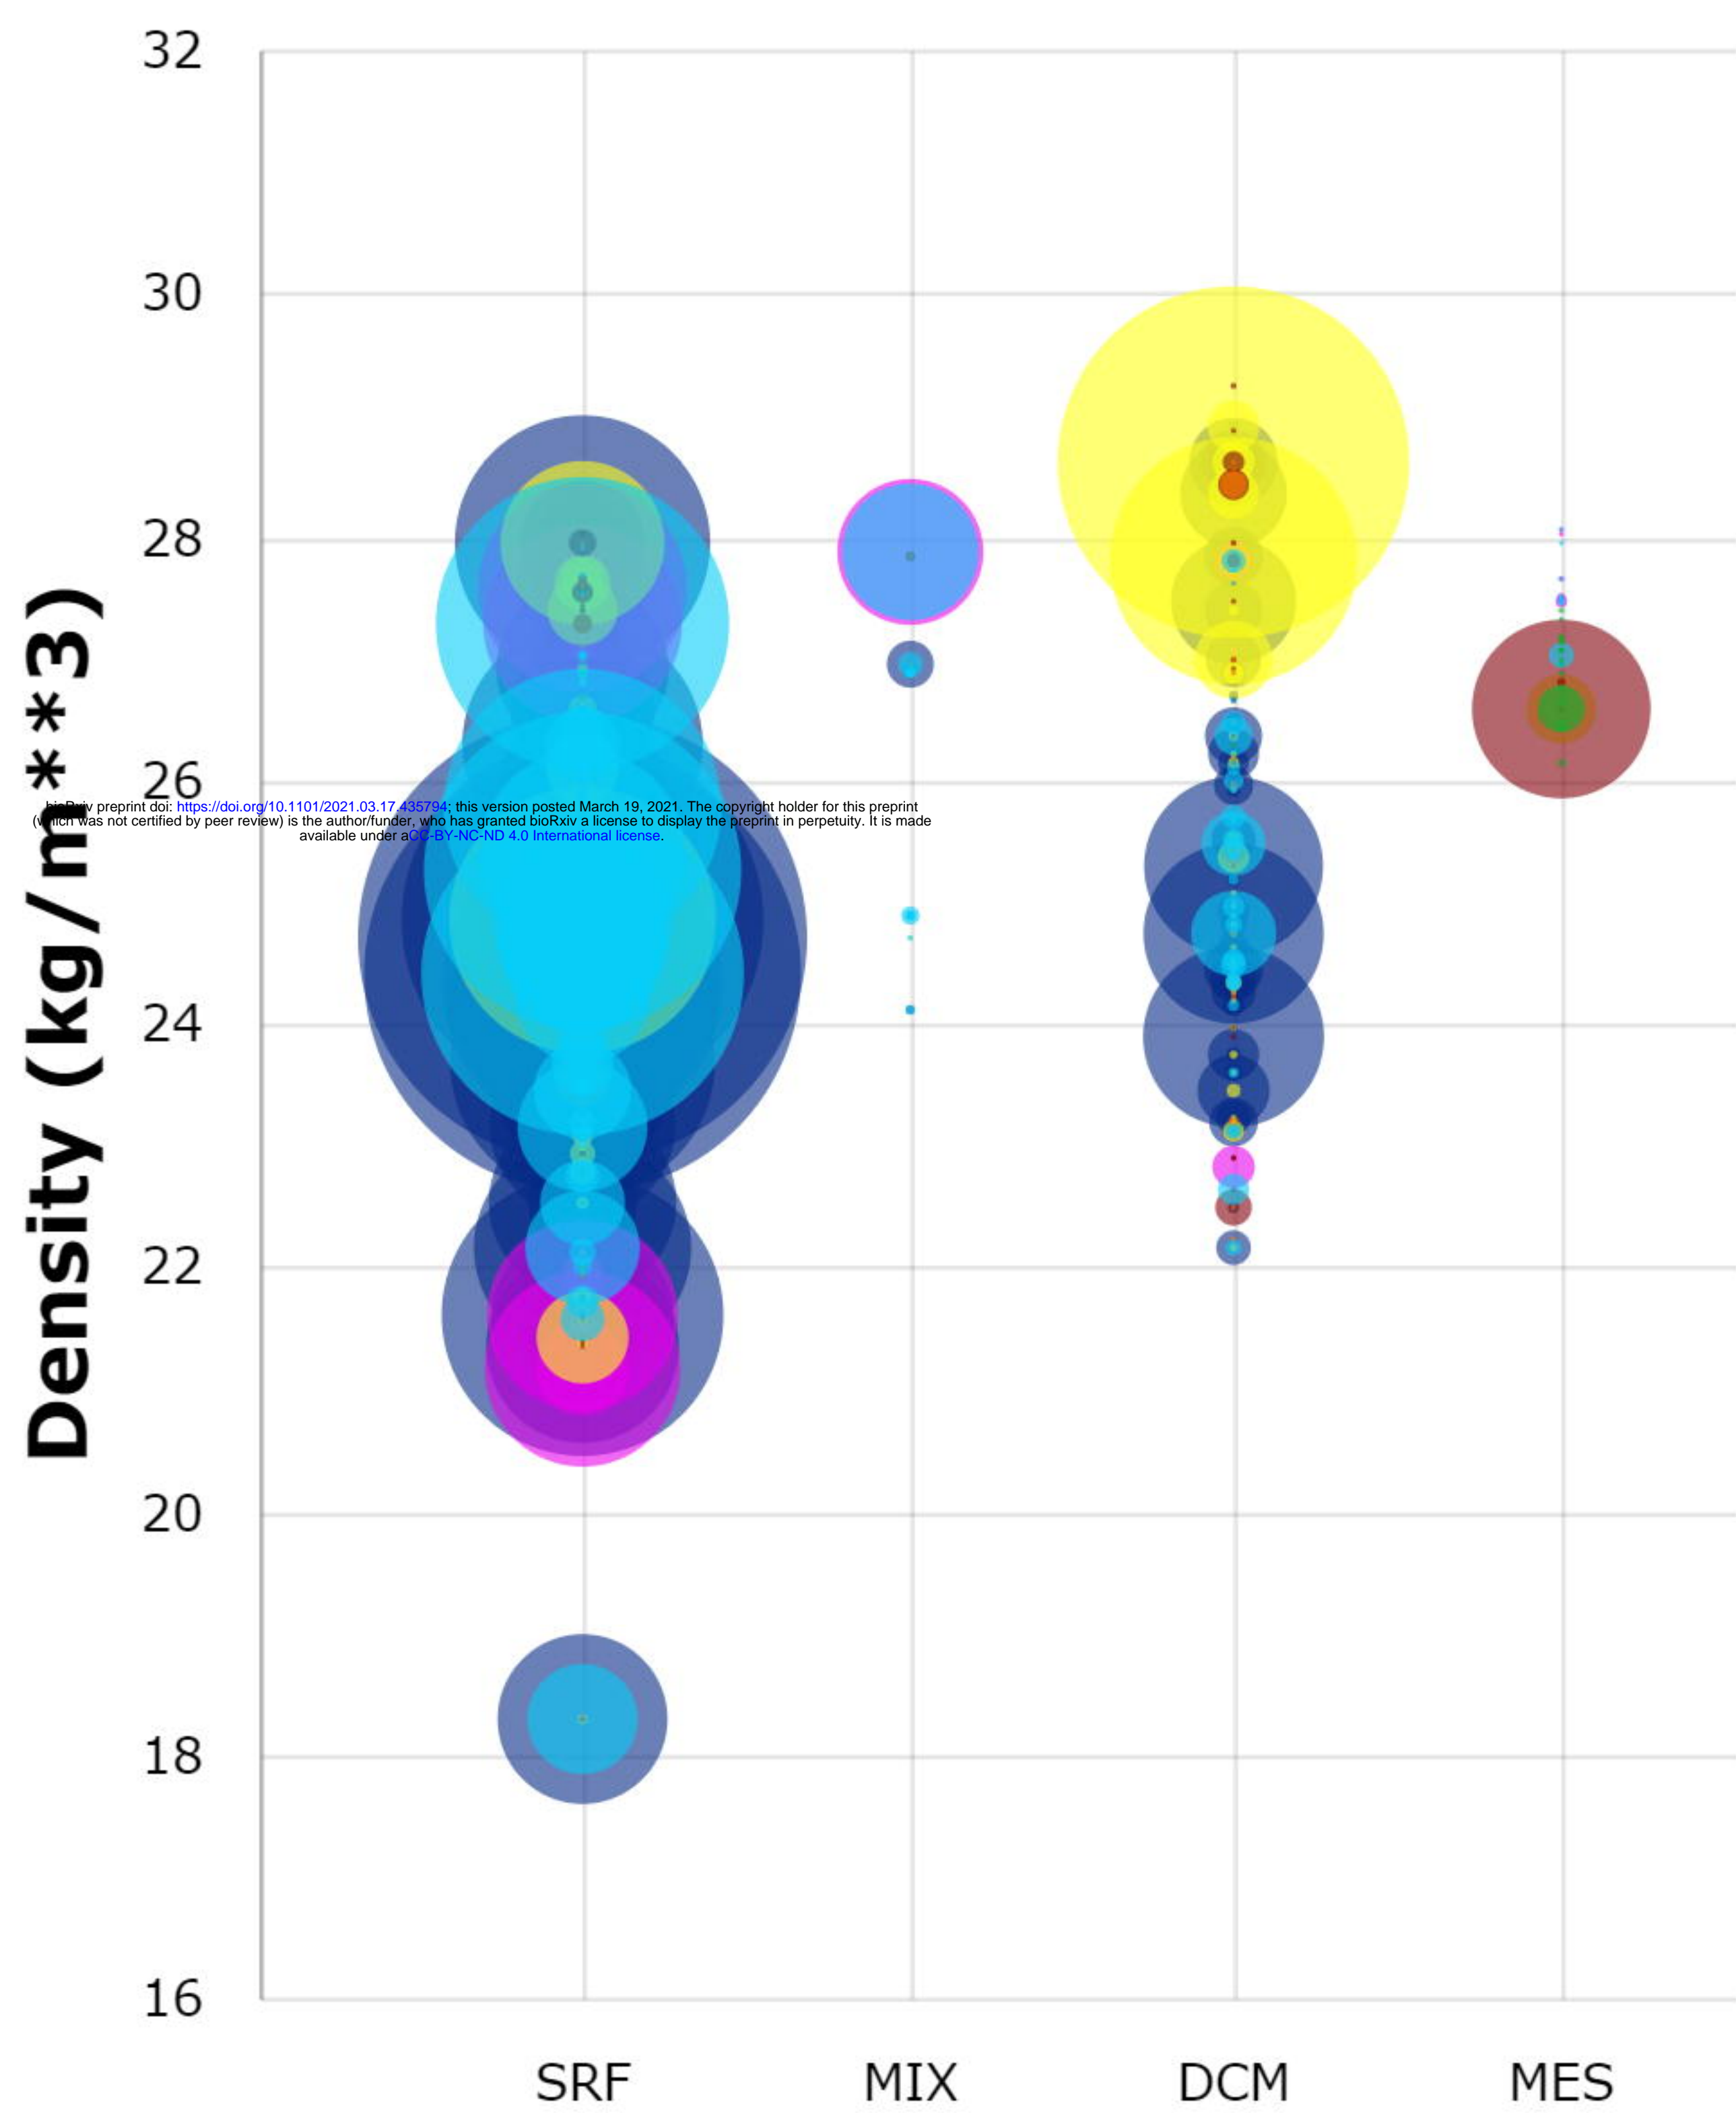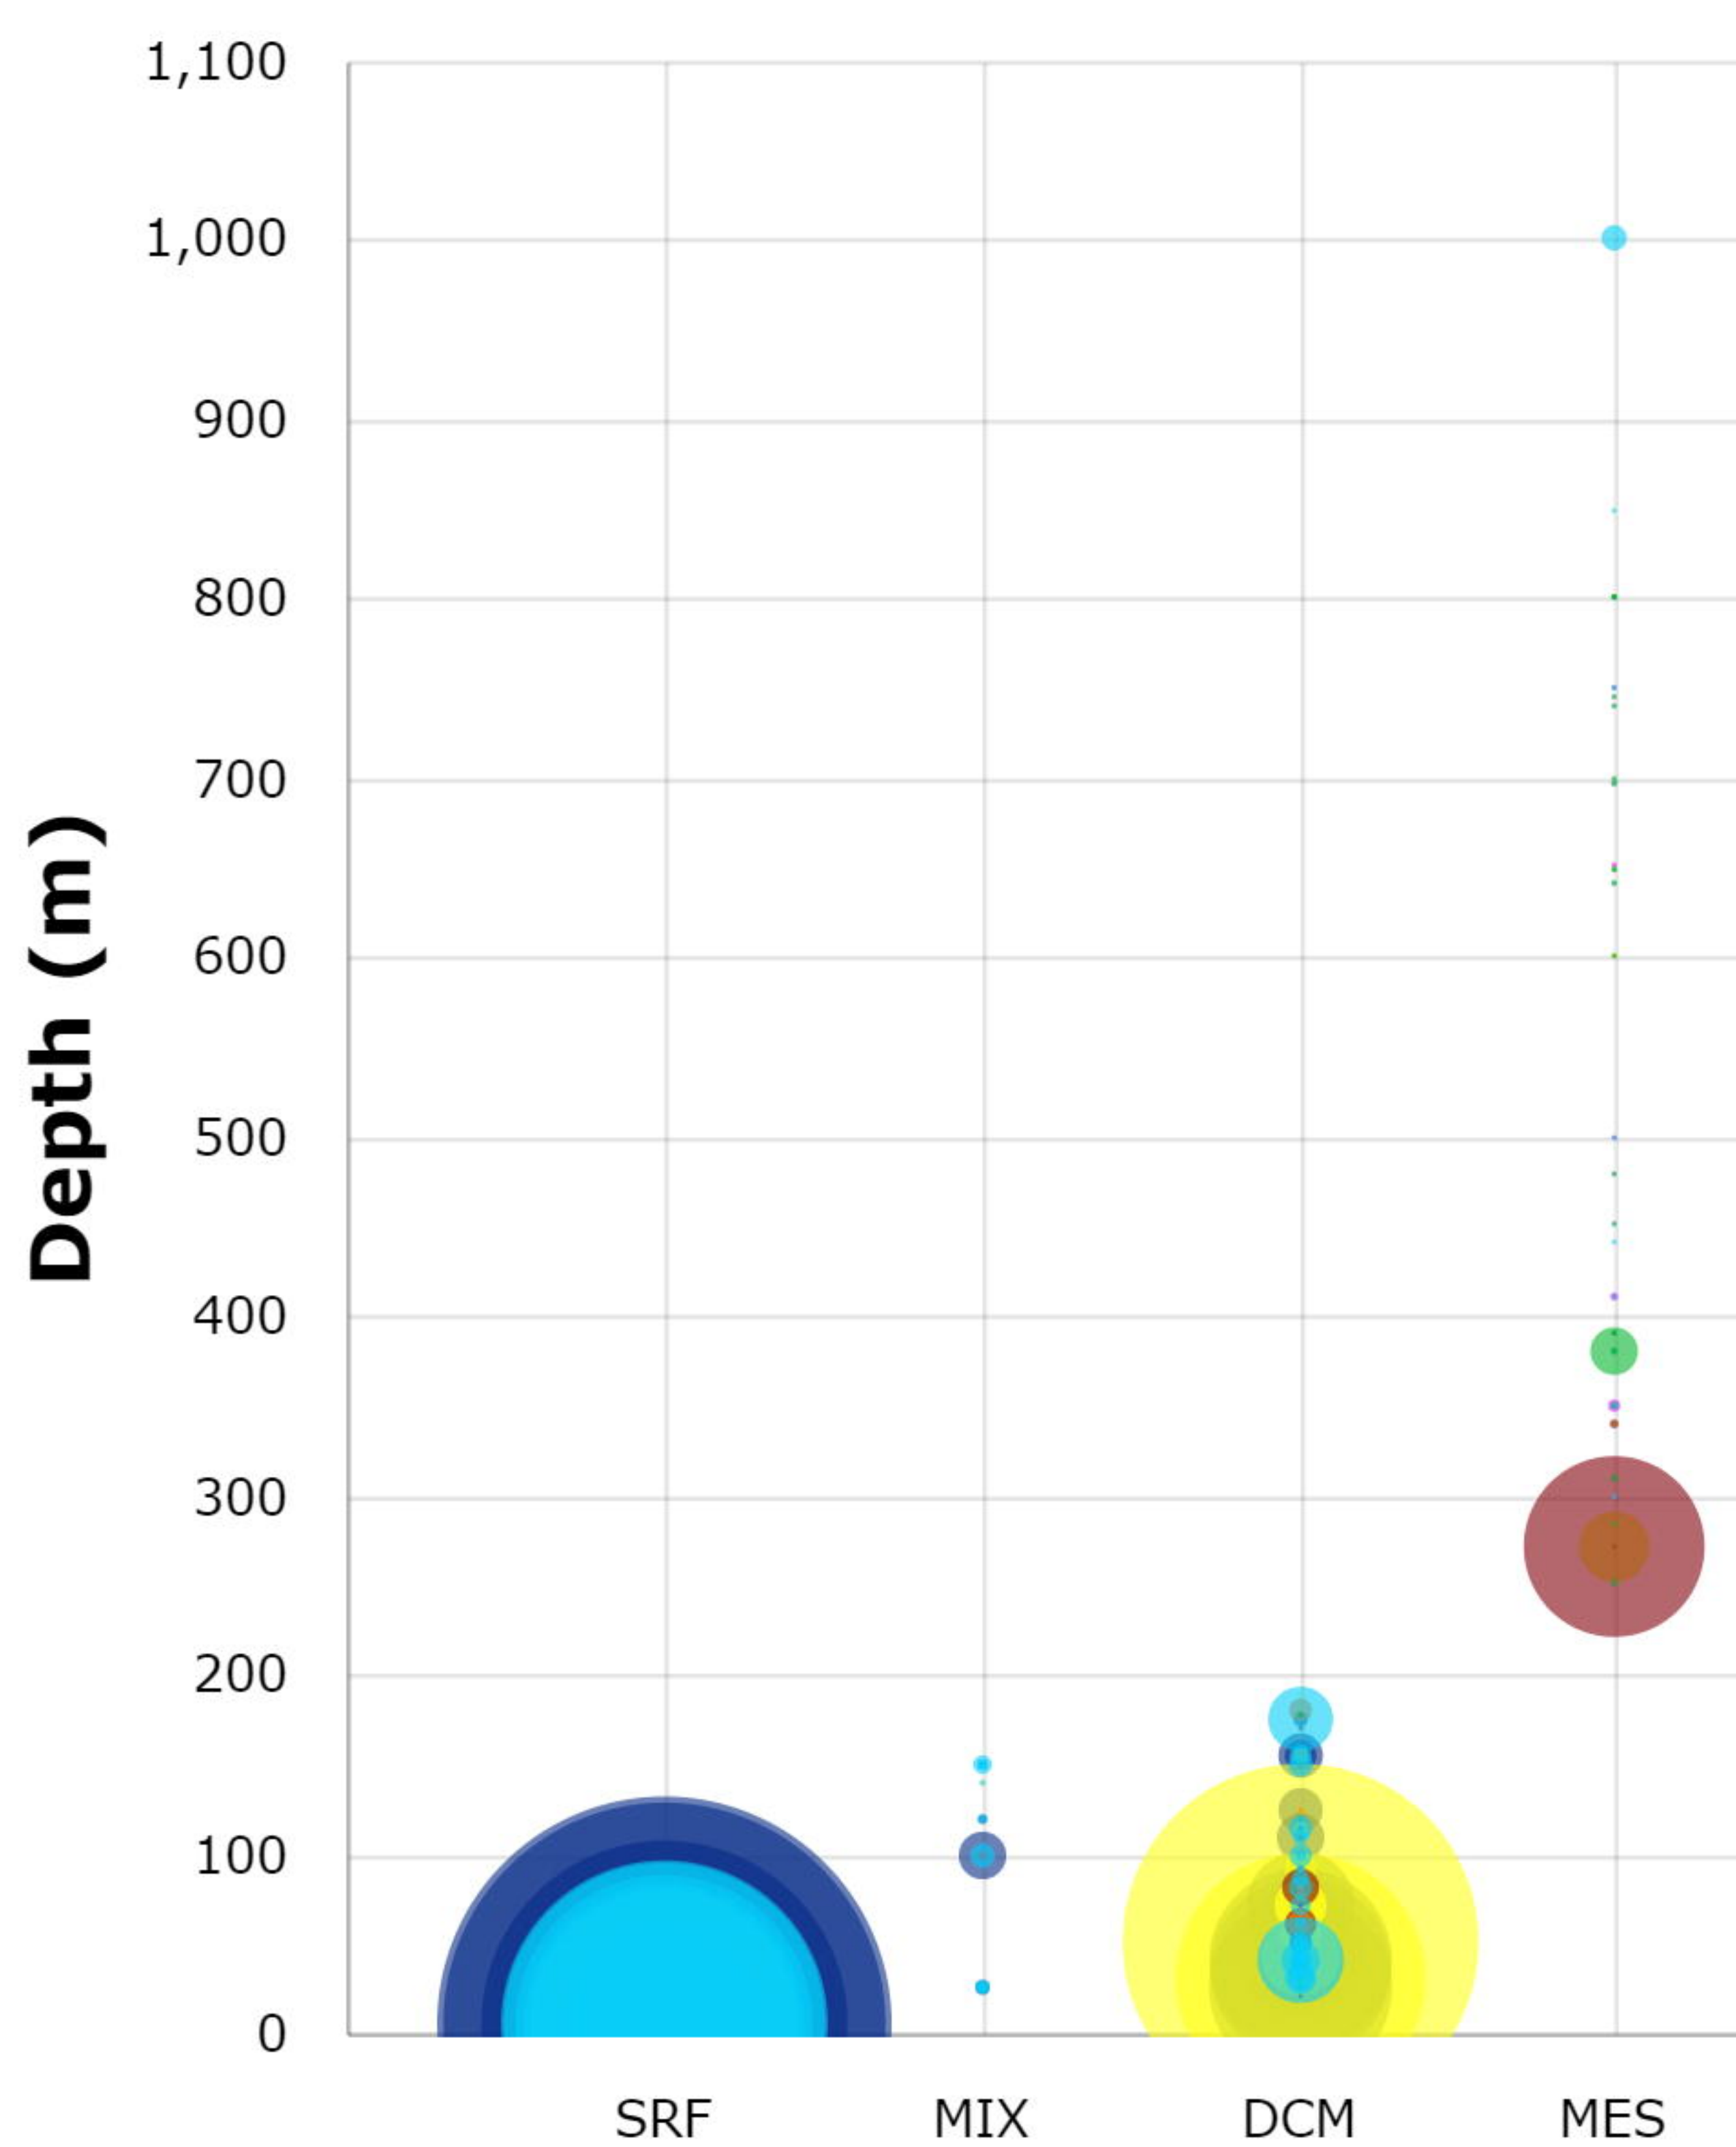



**Table 1.** The list of all the species described in the genus *Meringosphaera* and their final taxonomic homes.

| Species names (chronologically)                   | Final destiny                                                                                                           |
|---------------------------------------------------|-------------------------------------------------------------------------------------------------------------------------|
| <b><i>M. mediterranea</i> Lohmann, 1902[1903]</b> | type, valid                                                                                                             |
| <i>M. baltica</i> Lohmann, 1902[1903]             | Synonym of <i>M. mediterranea</i> acc. to (Lohmann, 1908)                                                               |
| <i>M. divergens</i> Lohmann, 1902[1903]           | Transferred to <i>Sciadosphaera</i> by (Pascher, 1938)                                                                  |
| <i>M. hydroidea</i> Lohmann, 1902[1903]           | Transferred to <i>Ophiaster</i> by (Lohmann, 1913)                                                                      |
| <i>M. serrata</i> Lohmann, 1908                   | Presumable coccolithophorid acc. to (Pascher, 1932)                                                                     |
| <i>M. radians</i> Lohmann, 1908                   | Transferred to <i>Apedinella</i> (Pedinellida) by (Campbell, 1973)                                                      |
| <i>M. henseni</i> Schiller, 1916                  | Presumable separate genus acc. to (Silva, 1979)                                                                         |
| <i>M. trisetata</i> Schiller, 1916                | Synonym of <i>Chaetoceros trondsenii</i> var. <i>trisetosa</i> (Bacillariophyceae) acc. to (Thronsen and Zingone, 1994) |
| <i>M. merzii</i> Schiller, 1925                   | Presumable separate genus acc. to (Silva, 1979)                                                                         |
| <i>M. tenerrima</i> Schiller, 1925                | Transferred to <i>Raphidosphaera</i> by (Silva, 1979)                                                                   |
| <i>M. setifera</i> Schiller, 1925                 | Transferred to <i>Raphidosphaera</i> by (Silva, 1979)                                                                   |
| <b><i>M. aculeata</i> Pascher, 1932</b>           | valid                                                                                                                   |
| <i>M. brevispina</i> Pascher, 1932                | Transferred to <i>Raphidosphaera</i> by (Silva, 1979)                                                                   |
| <i>M. sol</i> Pascher, 1932                       | Transferred to <i>Actinellipsoidion</i> (Xanthophyceae) by (Ettl, 1977)                                                 |
| <i>M. wulffiana</i> Pascher, 1938                 | Transferred to <i>Raphidosphaera</i> by (Silva, 1979)                                                                   |
| <i>M. spinosa</i> Prescott, 1949                  | Not a member of <i>Meringosphaera</i> complex acc. to (Silva, 1979)                                                     |
